# Supplementary material for: Finding the Pareto front for high-entropy-alloy catalysts
Source: Royal Society of Chemistry journal article supplement (doi:10.1039/d5sc06100h), 2026-01-01
Supplement: d5sc06100h2.zip [file experiment-data.xlsx]

## Sheet: OER
Alloy-species	Electrolyte	Overpotential	I-t	Remaining efficiency	Reference
AlCoFeMoCr/Pt	1.0 M KOH	260 mV	110 h	0.963	Top–Down Synthesis of Noble Metal Particles on High-Entropy Oxide Supports for Electrocatalysis
Co−Fe−Ga−Ni−Zn	1.0 M KOH	370 mV	10h	0.9	Low-cost high entropy alloy (HEA) for high-efficiency oxygen evolution reaction (OER)
CoCrFeNiMo	1.0 M KOH	220 mV	24 h	1	Microwave sintered porous CoCrFeNiMo high entropy alloy as an efficient electrocatalyst for alkaline oxygen evolution reaction
CuCoNiFeMn	1 M PBS	680 mV	15 h	0.6	Preparation, electrical and electrochemical characterizations of CuCoNiFeMn high-entropy-alloy for overall water splitting at neutral-pH
FeCoNiCrMn	1.0 M KOH	345 mV	20h	0.9	Thermodynamically driven metal diffusion strategy for controlled synthesis of high-entropy alloy electrocatalysts
FeCoNiCuPtIr	1.0 M KOH	255 mV	20h	0.9	Atomically Dispersed Intrinsic Hollow Sites of M‐M1–M (M1= Pt, Ir; M = Fe, Co, Ni, Cu, Pt, Ir) on FeCoNiCuPtIr Nanocrystals Enabling Rapid Water Redox
FeCoNiMnCu	1.0 M KOH	280 mV	40h	1	Cathodic plasma driven self-assembly of HEAs dendrites by pure single FCC FeCoNiMnCu nanoparticles as high efficient electrocatalysts for OER
FeCoNiCuZn	1.0 M KOH	340 mV	24 h	0.9	Regulating electrolytic Fe0.5CoNiCuZnx high entropy alloy electrodes for oxygen evolution reactions in alkaline solution
MnFeCoNiCu	1.0 M KOH	263 mV	24 h	1	Exploring the impact of atomic lattice deformation on oxygen evolution reactions based on a sub-5 nm pure face-centred cubic high-entropy alloy electrocatalyst
CoNiCuMnAl	1.0 M KOH	215 mV	24 h	1	High entropy alloy/C nanoparticles derived from polymetallic MOF as promising electrocatalysts for alkaline oxygen evolution reaction
MnFeCoNi	1.0 M KOH	245 mV	48 h	0.951	Ambient fast, large-scale synthesis of entropy-stabilized metal–organic framework nanosheets for electrocatalytic oxygen evolution
AlAgAuCoCuFeIrMoNiPdPtRhRuTi	0.5 M H2SO4	258 mV	10h	0.9	Nanoporous ultra-high-entropy alloys containing fourteen elements for water splitting electrocatalysis
AlNiFeCoMo	1.0 M KOH	240 mV	50 h	0.97	Noble metal-free nanoporous high-entropy alloys as highly efficient electrocatalysts for oxygen evolution reaction
AlFeCoNiCr	1.0 M KOH	240 mV	60 h	0.9	Multi-component nanoporous alloy/(oxy)hydroxide for bifunctional oxygen electrocatalysis and rechargeable Zn-air batteries
AlCrCuFeNi	1.0 M KOH	270 mV	35h	0.9	Scalable synthesis of nanoporous high entropy alloys for electrocatalytic oxygen evolution
FeMnCoCr	1.0 M KOH	247 mV	60 h	0.9	Corrosion engineering boosting bulk Fe50Mn30Co10Cr10 high-entropy alloy as high-efficient alkaline oxygen evolution reaction electrocatalyst
FeNiMnCrCu	1.0 M KOH	342 mV	10h	1	Electrocatalytic activity of high-entropy alloys toward oxygen evolution reaction
CoNiMnZnFe	1.0 M KOH	336 mV	20 h	0.869	In-situ electrochemical tuning of (CoNiMnZnFe)3O3.2 high-entropy oxide for efficient oxygen evolution reactions
MgCoNiCuZn	1.0 M KOH	360 mV	25 h	0.9	Defective high-entropy rocksalt oxide with enhanced metal‒oxygen covalency for electrocatalytic oxygen evolution
NiCoFeCrCoNiAl	1.0 M KOH	327 mV	120h	0.9	Preparation and electrocatalytic properties of (FeCrCoNiAl0.1)Ox high-entropy oxide and NiCo-(FeCrCoNiAl0.1)Ox heterojunction films
AlNiCoRuMo	1.0 M KOH	245 mV	100 h	0.956	Rugged High-Entropy Alloy Nanowires with in Situ Formed Surface Spinel Oxide As Highly Stable Electrocatalyst in Zn–Air Batteries
CuCoNiFeMn	1.0 M KOH	340 mV	24 h	0.9	Regulating electrolytic Fe0.5CoNiCuZnx high entropy alloy electrodes for oxygen evolution reactions in alkaline solution
LiFeCoNiCuZn	1.0 M KOH	347 mV	40 h	0.916	Engineering the oxygen vacancies of rocksalt-type high-entropy oxides for enhanced electrocatalysis
FeCoNiMnAl	0.5 M KHCO3	190 mV	50 h	0.986	Promoted self-construction of β-NiOOH in amorphous high entropy electrocatalysts for the oxygen evolution reaction
CrMnFeCoNi	1.0 M KOH	332 mV	20 h	0.896	High entropy spinel-structure oxide for electrochemical application
AlCoFeMoCr/Pt	1.0 M KOH	260 mV	100h	0.9	Engineering microdomains of oxides in high-entropy alloy electrodes toward efficient oxygen evolution
MnFeCoNi	1.0 M KOH	302 mV	10 h	0.9	Novel and promising electrocatalyst for oxygen evolution reaction based on MnFeCoNi high entropy alloy
CoCrFeNiMo	1.0 M KOH	220 mV	24 h	0.9	Microwave sintered porous CoCrFeNiMo high entropy alloy as an efficient electrocatalyst for alkaline oxygen evolution reaction
CoNiCuMnAl	1.0 M KOH	215 mV	24 h	0.9	High entropy alloy/C nanoparticles derived from polymetallic MOF as promising electrocatalysts for alkaline oxygen evolution reaction
CrFeCoNi	1.0 M KOH	196 mV	120 h	0.9	Engineering Microdomains of Oxides in High-Entropy Alloy Electrodes toward Efficient Oxygen Evolution
FeCoNiSiB	1.0 M KOH	230 mV	50 h	0.9	Nanostructured amorphous Fe29Co27Ni23Si9B12 high-entropy-alloy: an efficient electrocatalyst for oxygen evolution reaction
MnFeCoNiCu	1.0 M KOH	245 mV	48 h	0.951	Ambient fast, large-scale synthesis of entropy-stabilized metal–organic framework nanosheets for electrocatalytic oxygen evolution
FeNiCoCrMn	1.0 M KOH	229 mV	36 h	0.9	A New High Entropy Glycerate for High PerformanceOxygen Evolution Reaction
FeNiMoCrAl	1.0 M KOH	220 mV	50 h	0.9	Sputter-Deposited High Entropy Alloy Thin Film Electrocatalyst for Enhanced Oxygen Evolution Reaction Performance
NiCoFeMoMn	1.0 M KOH	350 mV	120 h	0.9	A freestanding nanoporous NiCoFeMoMn high-entropy alloy as an efficient electrocatalyst for rapid water splitting
AlCrFeNi	1.0 M KOH	259.5 mV	24 h	0.9	Strain-engineering-regulated Al0.6CrFe2Ni2 high entropy alloy enhances electrocatalytic water oxidation
FeCoNiCrMn	1.0 M KOH	345 mV	10 h	0.9	Thermodynamically driven metal diffusion strategy for controlled synthesis of high-entropy alloy electrocatalysts
FeCoNiCrMn	1.0 M KOH	282 mV	16 h	0.9885	Novel self-supporting thin film electrodes of FeCoNiCrMn high entropy alloy for excellent oxygen evolution reaction
FeCoNiIrRu	0.5 M H2SO4	241 mV	14 h	0.8	High-entropy alloy stabilized active Ir for highly efficient acidic oxygen evolution
MnNiCuCoVFeMoPdPtAuRuIr	1.0 M KOH	205 mV	100 h	0.968	Twelve-Component Free-Standing Nanoporous High-Entropy Alloys for Multifunctional Electrocatalysis
MnFeCoNiCu	1.0 M KOH	263 mV	24 h	0.9	Exploring the impact of atomic lattice deformation on oxygen evolution reactions based on a sub-5 nm pure face-centred cubic high-entropy alloy electrocatalyst
FeCoNiMnW	0.5 M H2SO4	512 mV	48 h	0.801	Pulse electrodeposited FeCoNiMnW high entropy alloys as efficient and stable bifunctional electrocatalysts for acidic water splitting
CoCrFeNiMo	1.0 M KOH	220 mV	24 h	0.9	Synthesis of flower-like cobalt, nickel phosphates grown on the surface of porous high entropy alloy for efficient oxygen evolution
FeCoNiZnGa	1.0 M KOH	370 mV	10 h	0.9	Low Cost, Easy Scalable High Entropy Alloy (HEA) FeCoNiZnGa for High-Efficiency Oxygen Evolution Reaction (OER)
CoFeNiPtTa	1.0 M KOH	290 mV	20 h	0.9	Pt-Based High-Entropy Alloy Nanoparticles as Bifunctional Electrocatalysts for Hydrogen and Oxygen Evolution
PtPdAuAgCuIrRuAlNiCoFeCrMoTi	1.0 M KOH	240 mV	50 h	0.938	A fourteen-component high-entropy alloy@oxide bifunctional electrocatalyst with a record-low ΔE of 0.61 V for highly reversible Zn–air batteries
PtRuFeCoNi	1.0 M KOH	370 mV	5 h	96%	New Conceptual Catalyst on Spatial High-Entropy Alloy Heterostructures for High-Performance Li-O2 Batteries
FeCoNiMnMo	1.0 M KOH	279 mV	1000 h	0.9	A Single-Phase FeCoNiMnMo High-Entropy Alloy Oxygen Evolution Anode Working in Alkaline Solution for over 1000 h
IrPdRhMoW	0.5 M H2SO4	188 mV	100 h	0.974	High-entropy alloy metallene for highly efficient overall water splitting in acidic media
PtFeNiCuMoRu	1.0 M KOH	259 mV	40 h	0.92	Convex Cube-Shaped Pt34Fe5Ni20Cu31Mo9Ru High Entropy Alloy Catalysts toward High-Performance Multifunctional Electrocatalysis
FeCoNiMnMo	1.0 M KOH	237 mV	200 h	0.9	A stable oxygen evolution splitting electrocatalysts high entropy alloy FeCoNiMnMo in simulated seawater
FeCoNiCrMn	1.0 M KOH	180 mV	12 h	0.9	High-entropy alloy stabilized and activated Pt clusters for highly efficient electrocatalysis
FeCoNiCuIr	1.0 M KOH	360 mV	10 h	0.942	Facile Synthesis of FeCoNiCuIr High Entropy Alloy Nanoparticles for Efficient Oxygen Evolution Electrocatalysis
CrMnFeCoNi	1.0 M KOH	315 mV	300 h	0.95	Water oxidation on CrMnFeCoNi high entropy alloy: Improvement through rejuvenation and spin polarization
AlFeNiCoMo	1.0 M KOH	228 mV	30 h	0.9	Self-supported AlFeNiCoMo high-entropy alloy with micropillar array structure for efficient oxygen evolution reaction
AgPdCuAuNiFeCo	1.0 M KOH	314 mV	21 h	0.9	Constructing a bifunctional catalyst with both high entropy alloy nanoparticles and Janus multi-principal alloy nanoparticles for high-performance overall water splitting
FeCoNiMnRu	1.0 M KOH	308 mV	600 h	0.9	Unraveling the electronegativity-dominated intermediate adsorption on high-entropy alloy electrocatalysts
PtRuCoNiCu	1.0 M KOH	166 mV	150 h	0.9	Strong High Entropy Alloy-Support Interaction Enables Efficient Electrocatalytic Water Splitting at High Current Density
NiCoCuFeCr	1.0 M KOH	213 mV	50 h	0.9	In Situ Synthesis and Microfabrication of High Entropy Alloy and Oxide Compounds by Femtosecond Laser Direct Writing under Ambient Conditions
FeCoNiCr	1.0 M KOH	187 mV	120 h	0.9	Surface-Tailored Medium Entropy Alloys as Radically Low Overpotential Oxygen Evolution Electrocatalysts
NiFeCoMnAl	1.0 M KOH	190 mV	50 h	0.986	Promoted self-construction of β-NiOOH in amorphous high entropy electrocatalysts for the oxygen evolution reaction
NiCoCrFeAlW	1.0 M KOH	270 mV	300 h	0.9	Eutectic dual-phase microstructure modulated porous high-entropy alloys as high-performance bifunctional electrocatalysts for water splitting
CoCrFeNiMo	0.5 M NaCl + 1 M KOH	260 mV	24 h	0.9	Surface Modified CoCrFeNiMo High Entropy Alloys for Oxygen Evolution Reaction in Alkaline Seawater
FeNiCoCrMnV	1.0 M KOH	247 mV	30 h	0.9	Carbothermal Shock Synthesis of High Entropy Oxide Catalysts: Dynamic Structural and Chemical Reconstruction Boosting the Catalytic Activity and Stability toward Oxygen Evolution Reaction
FeCoNiMnCu	1.0 M KOH	280 mV	40 h	0.9	Cathodic plasma driven self-assembly of HEAs dendrites by pure single FCC FeCoNiMnCu nanoparticles as high efficient electrocatalysts for OER
CoCrFeNiMn	1.0 M KOH	307 mV	20 h	0.9	Plasma nitrided CoCrFeNiMn high entropy alloy coating as a self-supporting electrode for oxygen evolution reaction
FeCoNiCrNb	0.1 m KOH	288 mV	30 h	0.9	High Entropy Intermetallic–Oxide Core–Shell Nanostructure as Superb Oxygen Evolution Reaction Catalyst
FeCoNiCuMn	1.0 M KOH	281 mV	20 h	0.9	A high-entropy atomic environment converts inactive to active sites for electrocatalysis
FeCoNiPB	1.0 M KOH	229 mV	22 h	0.83	Defect-rich FeCoNiPB/(FeCoNi)3O4-x high-entropy composite nanoparticles for oxygen evolution reaction: Impact of surface activation
NiCoFeMnCrP	1.0 M KOH	270 mV	24 h	0.95	High-entropy effect of a metal phosphide on enhanced overall water splitting performance
FeCoNiCrVB	1.0 M KOH	237 mV	20 h	0.9	Electrochemically reconstructed high-entropy amorphous FeCoNiCrVB as a highly active oxygen evolution catalyst
FeCoNiPB	1.0 M KOH	235 mV	40 h	0.9	Non-noble metal-based amorphous high-entropy oxides as efficient and reliable electrocatalysts for oxygen evolution reaction
CoFeNiMnZnB	1.0 M KOH	261 mV	20 h	0.887	CoFeNiMnZnB as a High-Entropy Metal Boride to Boost the Oxygen Evolution Reaction
CoCrFeMnMo	1.0 M KOH	302 mV	25 h	0.9	Low-temperature synthesized amorphous quasi-high-entropy carbonate electrocatalyst with superior surface self-optimization for efficient water oxidation
CuMoNiCoFe	1.0 M KOH	290 mV	24 h	0.9	Empirical approach for configuring high-entropy catalysts in alkaline water electrolysis
CoFeNiMnCu	1.0 M KOH	284 mV	8 h	0.897	New high-entropy transition-metal sulfide nanoparticles for electrochemical oxygen evolution reaction
FeCoNiMn	1.0 M KOH	291 mV	40 h	0.9	High-entropy FeCoNiMn (oxy)hydroxide as high-performance electrocatalyst for OER and boosting clean carrier production under quasi-industrial condition
AlNiCoRuMoCrFeTi	1.0 M KOH	240 mV	100 h	0.9	Eight-Component Nanoporous High-Entropy Oxides with Low Ru Contents as High-Performance Bifunctional Catalysts in Zn-Air Batteries
FeCoNiMgCr	1.0 M KOH	291 mV	40 h	0.9	A highly efficient high-entropy metal hydroxymethylate electrocatalyst for oxygen evolution reaction
FeNiCoCrMn	1.0 M KOH	199 mV	55 h	0.9	Self-Reconstruction of Sulfate-Containing High Entropy Sulfide for Exceptionally High-Performance Oxygen Evolution Reaction Electrocatalyst
FeCoNiCu	1.0 M KOH	439 mV	10 h	1	Electrochemical preparation and homogenization of face-centered FeCoNiCu medium entropy alloy electrodes enabling oxygen evolution reactions
CrFeCoNi	1.0 M KOH	196 mV	120 h	0.9	Facile synthesis of metal carbides with high-entropy strategy for engineering electrical properties
CoNiMnZnFe	1.0 M KOH	336 mV	20 h	0.869	In-situ electrochemical tuning of (CoNiMnZnFe)3O3.2 high-entropy oxide for efficient oxygen evolution reactions
MnFeCoNiCu	1.0 M KOH	221 mV	12 h	0.976	Sub-3-nm High-Entropy Metal Sulfide Nanoparticles with Synergistic Effects as Promising Electrocatalysts for Enhanced Oxygen Evolution Reaction
CoCuFeMo	1.0 M KOH	199 mV	72 h	1	Top-Level Design Strategy to Construct an Advanced High-Entropy Co–Cu–Fe–Mo (Oxy)Hydroxide Electrocatalyst for the Oxygen Evolution Reaction
CoCrFeMnNi	1.0 M KOH	220 mV	8 h	0.875	High entropy spinel metal oxide (CoCrFeMnNi)3O4 nanoparticles as novel efficient electrocatalyst for methanol oxidation and oxygen evolution reactions
MgCoNiCuZn	1.0 M KOH	360 mV	25 h	1	Defective high-entropy rocksalt oxide with enhanced metal‒oxygen covalency for electrocatalytic oxygen evolution
FeCrCoNiAl	1.0 M KOH	381 mV	120 h	0.9	Preparation and electrocatalytic properties of (FeCrCoNiAl0.1)Ox high-entropy oxide and NiCo-(FeCrCoNiAl0.1)Ox heterojunction films
FeCoNiMnZn	1.0 M KOH	265 mV	11 h	0.96	Activating surface atoms of high entropy oxides for enhancing oxygen evolution reaction
KNaMgMnFeCoNiF	1.0 M KOH	314 mV	10 h	0.667	High-Entropy Perovskite Fluorides: A New Platform for Oxygen Evolution Catalysis
MnFeCoNi	1.0 M KOH	302 mV	20 h	0.85	Novel and promising electrocatalyst for oxygen evolution reaction based on MnFeCoNi high entropy alloy
FeCoNiMnB	1.0 M KOH	266 mV	100 h	0.9629	Amorphous High-entropy Non-precious metal oxides with surface reconstruction toward highly efficient and durable catalyst for oxygen evolution reaction
CoNiMnZnFe	1.0 M KOH	276 mV	100 h	0.83	Solution combustion synthesis of high-entropy metal spinel oxide as oxygen evolution reaction catalyst
FeCoNiCuPd	1.0 M KOH	194 mV	24 h	0.95	Efficient FeCoNiCuPd thin-film electrocatalyst for alkaline oxygen and hydrogen evolution reactions
CoMnNiFe	1.0 M KOH	334 mV	10 h	0.9	Improved electrocatalytic performance of core-shell nico/nicoox with amorphous feooh for oxygen-evolution reaction
FeCrCoNiAl	1.0 M KOH	381 mV	120 h	0.9	Preparation and electrocatalytic properties of (FeCrCoNiAl0.1)Ox high-entropy oxide and NiCo-(FeCrCoNiAl0.1)Ox heterojunction films
CrMnFeCoNi	1.0 M KOH	220 mV	9 h	0.9	High entropy spinel metal oxide (CoCrFeMnNi)3O4 nanoparticles as novel efficient electrocatalyst for methanol oxidation and oxygen evolution reactions
MnFeCoNiCu	1.0 M KOH	281 mV	24 h	0.9	Defect-rich high-entropy oxide nanospheres anchored on high-entropy MOF nanosheets for oxygen evolution reaction
CrMnFeNiZn	1.0 M KOH	295 mV	20 h	0.95	Co-prosperity of electrocatalytic activity and stability in high entropy spinel (Cr0.2Mn0.2Fe0.2Ni0.2Zn0.2)3O4 for the oxygen evolution reaction
CrMnFeCoNiTiZn	1.0 M KOH	254 mV	60 h	0.95	Composition-controlled high entropy metal glycerate as high-performance electrocatalyst for oxygen evolution reaction
FeNiMnCrCu	1.0 M KOH	317 mV	10 h	0.9	Electrocatalytic activity of high-entropy alloys toward oxygen evolution reaction
CrMnFeCoNi	1.0 M KOH	325 mV	12 h	0.92	Carbon-Supported High-Entropy Oxide Nanoparticles as Stable Electrocatalysts for Oxygen Reduction Reactions
NiCoFeZnMo	1.0 M KOH	254 mV	100 h	0.9	High-Entropy Metal–Organic Framework Arrays Boost Oxygen Evolution Electrocatalysis
FeCoNiMo	1.0 M KOH	250 mV	65 h	0.95	High-Entropy Alloy with Mo-Coordination as Efficient Electrocatalyst for Oxygen Evolution Reaction
AlCoFeMoCr	1.0 M KOH	260 mV	110 h	0.963	Top–Down Synthesis of Noble Metal Particles on High-Entropy Oxide Supports for Electrocatalysis
CoFeNiMnMoPi	1.0 M KOH	270 mV	1 h	0.9	A high-entropy phosphate catalyst for oxygen evolution reaction
ZnCoNiCuFe	1.0 M KOH	202 mV	24 h	0.95	Synergistic coupling of Ni3ZnC0.7 decorated with homogeneous multimetal CoNiCuFe nitrogen-codoped carbon matrix as high-entropy catalysts for efficient overall water splitting
CoFeNiCrV	1.0 M KOH	232 mV	20 h	0.95	A universal, green, and self-reliant electrolytic approach to high-entropy layered (oxy)hydroxide nanosheets for efficient electrocatalytic water oxidation
AlNiCoFeCrAg	1.0 M KOH	280 mV	100 h	0.9	In situ coupling of Ag nanoparticles with high-entropy oxides as highly stable bifunctional catalysts for wearable Zn–Ag/Zn–air hybrid batteries
FeNiCoCrMn	1.0 M KOH	229 mV	24 h	0.9	A New High Entropy Glycerate for High Performance Oxygen Evolution Reaction
MnFeCoNiZn	1.0 M KOH	318 mV	10 h	1	Mechanochemically Assisted Synthesis of High-Entropy Layer-Structured Dittmarite Analogues
FeCoNiCrMn	1.0 M KOH	288 mV	95 h	0.987	Nanosized high entropy spinel oxide (FeCoNiCrMn)3O4 as a highly active and ultra-stable electrocatalyst for the oxygen evolution reaction
NiCoFeCrMo	1.0 M KOH	292 mV	25 h	0.8	Boosting the oxygen evolution electrocatalysis of high-entropy hydroxides by high-valence nickel species regulation
MgMnFeCoNi	1.0 M KOH	320 mV	20 h	0.95	High Configuration Entropy Activated Lattice Oxygen for O2 Formation on Perovskite Electrocatalyst
WMoVNbMnB	1.0 M KOH	115 mV	50 h	0.9	Application of transition metal high entropy boride in electrocatalytic hydrogen evolution reaction
BaPrIr	0.1 M HClO4	278 mV	10 h	0.9	Efficient acidic oxygen evolution reaction electrocatalyzed by iridium-based 12L-perovskites comprising trinuclear face-shared IrO6 octahedral strings
MnFeCoNi	1 M KOH	302 mV	20 h	0.9	Novel and promising electrocatalyst for oxygen evolution reaction based on MnFeCoNi high entropy alloy
AlCrCuFeNi	1 M KOH	270 mV	35 h	0.9	Scalable synthesis of nanoporous high entropy alloys for electrocatalytic oxygen evolution
AlNiCoRuMo	1 M KOH	245 mV	100 h	0.956	Rugged High-Entropy Alloy Nanowires with in Situ Formed Surface Spinel Oxide As Highly Stable Electrocatalyst in Zn–Air Batteries
CoCrFeNiMo	1 M KOH	220 mV	24 h	0.95	Microwave sintered porous CoCrFeNiMo high entropy alloy as an efficient electrocatalyst for alkaline oxygen evolution reaction
FeCoNiCuZn	1 M KOH	340 mV	24 h	0.9	Regulating electrolytic Fe0. 5CoNiCuZnx high entropy alloy electrodes for oxygen evolution reactions in alkaline solution
FeCoNiSiB	1 M KOH	230 mV	50 h	0.9	Nanostructured amorphous Fe29Co27Ni23Si9B12 high-entropy-alloy: an efficient electrocatalyst for oxygen evolution reaction
CrMnFeCoNiS	1 M KOH	116 mV	10 h	0.9	High-Entropy Metal Sulfide Nanoparticles Promise High-Performance Oxygen Evolution Reaction
CoCuFeMnNi	1 M KOH	350 mV	12 h	0.9	Low-temperature synthesis of small-sized high-entropy oxides for water oxidation
CoNiMnZnFe	1 M KOH	336 mV	20 h	0.869	In-situ electrochemical tuning of (CoNiMnZnFe) 3O3.2 high-entropy oxide for efficient oxygen evolution reactions
CoNiMnZnFe	1 M KOH	199 mV	72 h	0.9	Top-level design strategy to construct an advanced high-entropy Co–Cu–Fe–Mo (Oxy)hydroxide electrocatalyst for the oxygen evolution reaction
MgMnFeCoNi	1 M KOH	314 mV	10 h	0.85	High-entropy perovskite fluorides: a new platform for oxygen evolution catalysis
CoCuMgNiZnMnFe	1 M KOH	292 mV	6 h	0.9	Mechanochemical synthesis of novel rutile-type high entropy fluorides for electrocatalysis
MnFeCoNi	1 M KOH	302 mV	20 h	0.85	Novel and promising electrocatalyst for oxygen evolution reaction based on MnFeCoNi high entropy alloy
FeCoNiCrMn	1 M KOH	275 mV	60 h	0.9	Low-temperature synthesis of nano-porous high entropy spinel oxides with high grain boundary density for oxygen evolution reaction
FeCrCoNiCu	1 M KOH	330 mV	16 h	0.9	Ultrathin defective high-entropy layered double hydroxides for electrochemical water oxidation
CoZnCdCuMn	1 M KOH	220 mV	73 h	0.9	Carbon-supported high-entropy Co-Zn-Cd-Cu-Mn sulfide nanoarrays promise high-performance overall water splitting
FeNiCoCrCu	1 M KOH	270 mV	36 h	0.9	High-Entropy Oxide Derived from Metal–Organic Framework as a Bifunctional Electrocatalyst for Efficient Urea Oxidation and Oxygen Evolution Reactions
MoFeCoCu	1 M KOH	239 mV	25 h	0.8	Molybdenum oxide-iron, cobalt, copper alloy hybrid as efficient bifunctional catalyst for alkali water electrolysis
FeVNbTiZr	1 M KOH	348 mV	20 h	0.954	In-situ reconstruction of non-noble multi-metal core-shell oxyfluorides for water oxidation
Fe1.2(CoNi)	1 M KOH	246 mV	24 h	0.938	Regulation of electronic structure in medium-entropy metal sulfides nanoparticles as highly efficient bifunctional electrocatalysts for zinc-air battery
FeCoNiCuMo	1 M KOH	194 mV	100 h	0.9	Atomic scale synergistic interactions lead to breakthrough catalysts for electrocatalytic water splitting
WMoVNbCeB	1 M KOH	117 mV	60 h	0.8	Application of rare-earth high entropy boride in electrocatalytic hydrogen evolution reaction
NiFe	1 M KOH	235 mV	100 h	0.95	Zn constructs micro/nano porous structure to boost efficient oxygen evolution reaction for bulk NiFe alloy
FeCoNiMn	1 M KOH	248 mV	50 h	0.99	Highly efficient oxygen evolution reaction enabled by phosphorus-boron facilitating surface reconstruction of amorphous high-entropy materials
FeNi	1 M KOH	219 mV	50 h	0.9	Tuning Electronic Structure and Composition of FeNi Nanoalloys for Enhanced Oxygen Evolution Electrocatalysis via a General Synthesis Strategy
CrMnCoFeCoNi	1 M KOH	330 mV	1 h	0.95	Mesoporous High-Entropy Oxide Thin Films: Electrocatalytic Water Oxidation on High-Surface-Area Spinel (Cr0.2Mn0.2Fe0.2Co0.2Ni0.2)3O4 Electrodes
FeCoNiMoSi	1 M KOH	260 mV	90 h	0.95	Self-supported electrode Fe35Co20Ni20Mo20Si5 alloy ribbon: Electronic structure modulating oxygen evolution reaction
LaCoMnFeNiCu	1 M KOH	309 mV	72 h	1	A general strategy for preparing hollow spherical multilayer structures of Oxygen-Rich vacancy transition metal Oxides, especially high entropy perovskite oxides
NiMnFeMo	1 M KOH	265 mV	45 h	0.9	Free-standing nanoporous NiMnFeMo alloy: An efficient non-precious metal electrocatalyst for water splitting
CoMnNiFeZn	1 M KOH	238 mV	10 h	0.894	Stabilizing Oxygen Vacancy in Entropy-Engineered CoFe2O4-Type Catalysts for Co-prosperity of Efficiency and Stability in an Oxygen Evolution Reaction
AlNiFeCoMo	1 M KOH	240 mV	50 h	1	Noble Metal-Free Nanoporous High-Entropy Alloys as Highly Efficient Electrocatalysts for Oxygen Evolution Reaction
CoMnNiFeMg	1 M KOH	240 mV	100 h	0.9	Electronic structure modification induced electrochemical performance enhancement of bi-functional multi-metal hydroxide
CoCrNiFe	1 M KOH	285 mV	10 h	0.8	Ternary duplex FeCoNi alloy prepared by cathode plasma electrolytic deposition as a high-efficient electrocatalyst for oxygen evolution reaction
FeNi	1 M KOH	298 mV	1.6 h	0.95	Bimetallic NiFe alloys as highly efficient electrocatalysts for the oxygen evolution reaction
NiMo	1 M KOH	351 mV	170 h	0.875	Effect of Graphene Encapsulation of NiMo Alloys on Oxygen Evolution Reaction
NiCo	1 M KOH	214 mV	60 h	0.967	Surface nitridation of nickel-cobalt alloy nanocactoids raises the performance of water oxidation and splitting
NiFeCu	1 M KOH	180 mV	20 h	1	Dendritic core-shell nickel-iron-copper metal/metal oxide electrode for efficient electrocatalytic water oxidation
FeNiMnCrCu	1 M KOH	342 mV	10 h	0.9	Electrocatalytic activity of high-entropy alloys toward oxygen evolution reaction
NiFe	1 M KOH	265 mV	20 h	0.95	Amorphous versus Crystalline in Water Oxidation Catalysis: A Case Study of NiFe Alloy
MnFeCoNi	1 M KOH	302 mV	20 h	0.8	Novel and promising electrocatalyst for oxygen evolution reaction based on MnFeCoNi high entropy alloy
FeCoNiMo	1 M KOH	281 mV	110 h	0.974	Boosting the activity and stability of self-supporting FeCoNiMoPB amorphous alloy for oxygen evolution
FeNiSi	1 M KOH	269 mV	20 h	0.95	Annealing and electrochemically activated amorphous ribbons: Surface nanocrystallization and oxidation effects enhanced for oxygen evolution performance
FeCoCu	1 M KOH	265 mV	24 h	0.8	Alloying strategy for constructing multi-component nano-catalysts towards efficient and durable oxygen evolution in alkaline electrolyte
NiAl	1 M KOH	280 mV	180 h	0.95	Strain-modulated Ni3Al alloy promotes oxygen evolution reaction
MgFeCoNiCu	1 M KOH	300 mV	25 h	0.95	Iron-concentration adjusted Multi-Metal oxides for optimized oxygen evolution reaction performance
FeCo	1 M KOH	254 mV	24 h	0.94	Large-scale synthesis of low-cost bimetallic polyphthalocyanine for highly stable water oxidation
FeNiMo	1 M KOH	208 mV	20 h	0.95	In-situ probing the rapid reconstruction of FeOOH-decorated NiMoO4 nanowires with boosted oxygen evolution activity
MoNiCo	1 M KOH	280 mV	24 h	0.995	Molybdenum doped induced amorphous phase in cobalt acid nickel for supercapacitor and oxygen evolution reaction
CeNiCo	1 M KOH	219 mV	48 h	0.995	Controlled synthesis of CeOx-NiCo2O4 nanocomposite with 3D umbrella-shaped hierarchical structure: A sharp-tip enhanced electrocatalyst for efficient oxygen evolution reaction over a broad pH region
CoCr	1 M KOH	307 mV	20 h	0.8	High-valent Zirconium-doping modified Co3O4 weave-like nanoarray boosts oxygen evolution reaction
NiFeCr	1 M KOH	240 mV	24 h	0.995	Capturing the active sites of multimetallic (oxy)hydroxides for the oxygen evolution reaction
NbCo	1 M KOH	273 mV	12 h	0.995	Regulation of the electronic structure of Co4N with novel Nb to form hierarchical porous nanosheets for electrocatalytic overall water splitting
NiCo	1 M KOH	250 mV	24 h	0.8	Optically transparent ultrathin NiCo alloy oxide film: Precise oxygen vacancy modulation and control for enhanced electrocatalysis of water oxidation
NiCoCe	1 M KOH	301 mV	52 h	0.978	OER properties of Ni–Co–CeO2/Ni composite electrode prepared by magnetically induced jet electrodeposition
MoFeCoSe	1 M KOH	235 mV	12 h	0.9	Bifunctional Mo-doped FeCo–Se aerogels catalysts with excellent OER and ORR activities for electro-Fenton process
FeCoCrNi	1 M KOH	300 mV	20 h	0.93	Lattice oxygen activation enabled by high-valence metal sites for enhanced water oxidation
NiFe	1 M KOH	195 mV	115 h	0.95	Entropy-Stabilized Multicomponent Porous Spinel Nanowires of NiFeXO4 (X = Fe, Ni, Al, Mo, Co, Cr) for Efficient and Durable Electrocatalytic Oxygen Evolution Reaction in Alkaline Medium
FeCoNiCu	1 M KOH	250 mV	60 h	0.9	Phosphorus-doping promotes the electrochemical etching of metals to nanoporous electrodes for efficient and durable overall water splitting
CoFe	1 M KOH	273 mV	32 h	90%	Self-supported hierarchical CoFe-LDH/NiCo2O4/NF core-shell nanowire arrays as an effective electrocatalyst for oxygen evolution reaction
NiFe	0.1 M KOH	270 mV	150 h	0.95	Bimetal nanoparticles hybridized with carbon nanotube boosting bifunctional oxygen electrocatalytic performance
MnRu	0.5 M H2SO4	158 mV	10 h	0.9	Mn-Doped RuO2 Nanocrystals as Highly Active Electrocatalysts for Enhanced Oxygen Evolution in Acidic Media
RuFe	0.1 M HClO4	187 mV	50 h	0.9	Sulfate-Functionalized RuFeOx as Highly Efficient Oxygen Evolution Reaction Electrocatalyst in Acid
SrRuIr	0.5 M H2SO4	190 mV	1500 h	0.9	Stabilizing Highly Active Ru Sites by Suppressing Lattice Oxygen Participation in Acidic Water Oxidation
RuCo	1 M KOH	171.2 mV	10 h	0.9	Heterostructured Inter-Doped Ruthenium–Cobalt Oxide Hollow Nanosheet Arrays for Highly Efficient Overall Water Splitting
RuIrCa	0.5 M KHCO3	250 mV	200 h	0.9	Boosting Neutral Water Oxidation through Surface Oxygen Modulation
CrRu	0.5 M H2SO4	178 mV	10 h	0.95	Chromium-ruthenium oxide solid solution electrocatalyst for highly efficient oxygen evolution reaction in acidic media
WErRu	0.5 M H2SO4	168 mV	500 h	0.95	Dopants fixation of Ruthenium for boosting acidic oxygen evolution stability and activity
RuTe	1 M KOH	275 mV	12 h	0.95	Crystallized RuTe2 as unexpected bifunctional catalyst for overall water splitting
RuTe	0.5 M H2SO4	245 mV	24 h	0.9	Amorphization activated ruthenium-tellurium nanorods for efficient water splitting
MgMnFeCoNi	1 M KOH	304 mV	10 h	1	Structural Framework-Guided Universal Design of High-Entropy Compounds for Efficient Energy Catalysis
RuCu	0.5 M H2SO4	175 mV	50 h	0.95	Constructing electron-regulating structure to stabilize ruthenium sites for efficient acidic water oxidation
RuTi	0.5 M H2SO4	275 mV	12 h	0.8	Electrocatalyst of RuO2 decorating TiO2 nanowire arrays for acidic oxygen evolution
RuMn	1 M KOH	194 mV	30 h	1	Defect-rich ruthenium dioxide electrocatalyst enabled by electronic reservoir effect of carbonized polymer dot for remarkable pH-universal oxygen evolution
NdIr	0.1 M HClO4	291 mV	19 h	0.95	Nd6Ir2O13 as an Efficient Electrocatalyst Boosts the Oxygen Evolution Reaction in Acidic Media
IrMn	0.5 M H2SO4	218 mV	650 h	0.95	Confined Ir single sites with triggered lattice oxygen redox: Toward boosted and sustained water oxidation catalysis
CeCo	1 M KOH	282 mV	12 h	0.95	Boosting Electrocatalytic Oxygen Evolution: Superhydrophilic/Superaerophobic Hierarchical Nanoneedle/Microflower Arrays of CexCo3–xO4 with Oxygen Vacancies
MoFe	1.0 M KOH	210 mV	30 h	0.9	Engineering of Amorphous Structures and Sulfur Defects into Ultrathin FeS Nanosheets to Achieve Superior Electrocatalytic Alkaline Oxygen Evolution
CoMn	1.0 M KOH	279 mV	12 h	0.95	Cobalt-doped MnO2 ultrathin nanosheets with abundant oxygen vacancies supported on functionalized carbon nanofibers for efficient oxygen evolution
RuFe	0.5 M H2SO4	238 mV	9 h	0.95	A chemical etching strategy to improve and stabilize RuO2-based nanoassemblies for acidic oxygen evolution
CoSe	1.0 M KOH	231 mV	50 h	0.915	Selenic Acid Etching Assisted Vacancy Engineering for Designing Highly Active Electrocatalysts toward the Oxygen Evolution Reaction
FeNiCo	1.0 M KOH	293 mV	25 h	0.95	Fe-Doped Ni–Co Phosphide Nanoplates with Planar Defects as an Efficient Bifunctional Electrocatalyst for Overall Water Splitting
VNi	1.0 M KOH	290 mV	20 h	0.9	Electronic Structure Reconfiguration toward Pyrite NiS2via Engineered Heteroatom Defect Boosting Overall Water Splitting
NiMn	1.0 M KOH	279 mV	50 h	0.95	Tremella-like Ni3S2/MnS with ultrathin nanosheets and abundant oxygen vacancies directly used for high speed overall water splitting
CoRuIr	0.1 M HClO4	235 mV	25 h	0.95	Transition-Metal-Doped RuIr Bifunctional Nanocrystals for Overall Water Splitting in Acidic Environments
AlCoSe	1.0 M KOH	263 mV	24 h	0.95	Ce-doped self-assembled ultrathin CoOOH nanosheets as efficient oxygen evolution reaction electrocatalyst
NiCoFe	1.0 M KOH	265 mV	35 h	0.9	Ambient Fast Synthesis and Active Sites Deciphering of Hierarchical Foam-Like Trimetal–Organic Framework Nanostructures as a Platform for Highly Efficient Oxygen Evolution Electrocatalysis
CoFe	1.0 M KOH	265 mV	40 h	0.95	Expediting in-Situ Electrochemical Activation of Two-Dimensional Metal–Organic Frameworks for Enhanced OER Intrinsic Activity by Iron Incorporation
NiFe	1.0 M KOH	221 mV	20 h	0.9	Large-Scale, Bottom-Up Synthesis of Binary Metal–Organic Framework Nanosheets for Efficient Water Oxidation
FeNi	1.0 M KOH	243 mV	20 h	0.95	Constructing a highly oriented layered MOF nanoarray from a layered double hydroxide for efficient and long-lasting alkaline water oxidation electrocatalysis
FeNi	1.0 M KOH	233 mV	13.9 h	0.95	NiFe-Based Metal–Organic Framework Nanosheets Directly Supported on Nickel Foam Acting as Robust Electrodes for Electrochemical Oxygen Evolution Reaction
CoNi	1.0 M KOH	215 mV	300 h	0.95	Self-dissociation-assembly of ultrathin metal-organic framework nanosheet arrays for efficient oxygen evolution
FeNiCo	1.0 M KOH	244 mV	16 h	0.9	Nanoscale Trimetallic Metal–Organic Frameworks Enable Efficient Oxygen Evolution Electrocatalysis
CoFe	1.0 M KOH	280 mV	12 h	0.9	Mixed-Node Metal–Organic Frameworks as Efficient Electrocatalysts for Oxygen Evolution Reaction
NiFe	1.0 M KOH	258 mV	32 h	0.95	Engineering the Activity and Stability of MOF-Nanocomposites for Efficient Water Oxidation
NiFe	0.1 M KOH	240 mV	5.5 h	0.9	Ultrathin metal-organic framework array for efficient electrocatalytic water splitting
NiCoFe	1.0 M KOH	238 mV	36 h	0.991	Constructing NiCo/Fe3O4 Heteroparticles within MOF-74 for Efficient Oxygen Evolution Reactions
CoMo	1.0 M KOH	331 mV	20 h	0.8	Coupling Magnetic Single-Crystal Co2Mo3O8 with Ultrathin Nitrogen-Rich Carbon Layer for Oxygen Evolution Reaction
NiFe	1.0 M KOH	230 mV	17 h	1	Strong Electronic Interaction Enhanced Electrocatalysis of Metal Sulfide Clusters Embedded Metal–Organic Framework Ultrathin Nanosheets toward Highly Efficient Overall Water Splitting
CoFe	1.0 M KOH	198 mV	100 h	0.95	Rational construction of macroporous CoFeP triangular plate arrays from bimetal–organic frameworks as high-performance overall water-splitting catalysts
CoNi	1.0 M KOH	251 mV	12 h	1	CoNi-based metal–organic framework nanoarrays supported on carbon cloth as bifunctional electrocatalysts for efficient water-splitting
FeNi	1.0 M KOH	190 mV	20 h	0.95	Oxygen-Evolution Catalysts Based on Iron-Mediated Nickel Metal–Organic Frameworks
FeNi	1.0 M KOH	222 mV	50 h	0.9	Preparation of an Fe2Ni MOF on nickel foam as an efficient and stable electrocatalyst for the oxygen evolution reaction
CoFe	1.0 M KOH	280 mV	10 h	0.8	Bimetal–organic framework MIL-53(Co–Fe): an efficient and robust electrocatalyst for the oxygen evolution reaction
CoFe	1.0 M KOH	277 mV	0.5 h	0.95	From Low- to High-Crystallinity Bimetal–Organic Framework Nanosheet with Highly Exposed Boundaries: An Efficient and Stable Electrocatalyst for Oxygen Evolution Reaction
FeNi	1.0 M KOH	213 mV	10 h	0.95	Conductive metal–organic framework nanowire arrays for electrocatalytic oxygen evolution
NiFe	1.0 M KOH	260 mV	2.7 h	0.9	High-performance oxygen evolution catalyst using two-dimensional ultrathin metal-organic frameworks nanosheets
FeNi	1.0 M KOH	243 mV	20 h	0.95	Constructing a highly oriented layered MOF nanoarray from a layered double hydroxide for efficient and long-lasting alkaline water oxidation electrocatalysis
FeNi	1.0 M KOH	235 mV	100 h	0.9	Synergistically well-mixed MOFs grown on nickel foam as highly efficient durable bifunctional electrocatalysts for overall water splitting at high current densities
FeNi	1.0 M KOH	270 mV	12 h	0.95	Highly Conductive Bimetallic Ni–Fe Metal Organic Framework as a Novel Electrocatalyst for Water Oxidation
CoFe	1.0 M KOH	265 mV	40 h	0.95	Expediting in-Situ Electrochemical Activation of Two-Dimensional Metal–Organic Frameworks for Enhanced OER Intrinsic Activity by Iron Incorporation
NiFe	1.0 M KOH	277 mV	30 h	0.9	Bi-metallic MOFs possessing hierarchical synergistic effects as high performance electrocatalysts for overall water splitting at high current densities
FeCo	1.0 M KOH	256 mV	30 h	0.9	Ultrathin Prussian blue analogue nanosheet arrays with open bimetal centers for efficient overall water splitting
CoNi	1.0 M KOH	291 mV	5 h	0.9	In situ synthesis of quasi-needle-like bimetallic organic frameworks on highly porous graphene scaffolds for efficient electrocatalytic water oxidation
NiFe	1.0 M KOH	250 mV	136 h	1	Constructing a Graphene-Encapsulated Amorphous/Crystalline Heterophase NiFe Alloy by Microwave Thermal Shock for Boosting the Oxygen Evolution Reaction
CoMo	1.0 M KOH	305 mV	50 h	1	Structural Design of Amorphous CoMoPx with Abundant Active Sites and Synergistic Catalysis Effect for Effective Water Splitting
FeNiCo	1.0 M KOH	293 mV	22 h	0.95	Fe-Doped Ni–Co Phosphide Nanoplates with Planar Defects as an Efficient Bifunctional Electrocatalyst for Overall Water Splitting
CoNi	1.0 M KOH	258 mV	24 h	0.95	N-enriched porous carbon encapsulated bimetallic phosphides with hierarchical structure derived from controlled electrodepositing multilayer ZIFs for electrochemical overall water splitting
CoFe	1.0 M KOH	274 mV	10 h	0.9	Constructing 2D MOFs from 2D LDHs: a highly efficient and durable electrocatalyst for water oxidation
IrFe	0.5 M H2SO4	300 mV	4 h	0.412	Low Ir-content Ir/Fe@NCNT bifunctional catalyst for efficient water splitting
CuRu	1.0 M KOH	330 mV	12 h	0.862	Loading uniformly distributed CuRu alloys on carbon nanotubes via flash Joule heating for high-performance electrocatalytic water splitting
AuIr	0.5 M H2SO4	261 mV	40 h	0.95	Significantly Enhanced Overall Water Splitting Performance by Partial Oxidation of Ir through Au Modification in Core–Shell Alloy Structure
NiFeMo	1.0 M KOH	300 mV	30 h	0.95	Magnetic-field-regulated Ni-Fe-Mo ternary alloy electrocatalysts with enduring spin polarization enhanced oxygen evolution reaction
MoCo	1.0 M KOH	247 mV	50 h	0.9	2D porous molybdenum nitride/cobalt nitride heterojunction nanosheets with interfacial electron redistribution for effective electrocatalytic overall water splitting
CoFe	1.0 M KOH	266 mV	16 h	1	CoxFeyN nanoparticles decorated on graphene sheets as high-performance electrocatalysts for the oxygen evolution reaction
NiMnFeMo	1.0 M KOH	290 mV	10 h	0.95	Free-standing nanoporous NiMnFeMo alloy: An efficient non-precious metal electrocatalyst for water splitting
AlNiCoIrMo	0.5 M H2SO4	233 mV	45 h	0.8	Nanoporous Al-Ni-Co-Ir-Mo High-Entropy Alloy for Record-High Water Splitting Activity in Acidic Environments
CoFe	1.0 M KOH	278 mV	40 h	0.9	3D hollow Co–Fe–P nanoframes immobilized on N,P-doped CNT as an efficient electrocatalyst for overall water splitting
CoFeW	1.0 M KOH	234 mV	120 h	0.9	Octahedral Coordinated Trivalent Cobalt Enriched Multimetal Oxygen-Evolution Catalysts
CoMo	1.0 M KOH	230 mV	30 h	0.9	A Universal Process: Self-Templated and Orientated Fabrication of XMoO4 (X: Ni, Co, or Fe) Nanosheets on MoO2 Nanoplates as Electrocatalysts for Efficient Water Splitting
NiCoFe	1.0 M KOH	435 mV	12 h	0.9	NiPd nano-alloy film as a promising low overpotential electrocatalyst for high activity water oxidation reaction
NiPd	1.0 M KOH	170 mV	12 h	0.9	NiPd nano-alloy film as a promising low overpotential electrocatalyst for high activity water oxidation reaction
AuCuCo	0.1 M KOH	596 mV	4 h	0.8	Enhanced Electrocatalytic Performance of Self-supported AuCuCo for Oxygen Reduction and Evolution Reactions
AuNiFe	1.0 M KOH	221 mV	22 h	1	Au Promoted Nickel–Iron Layered Double Hydroxide Nanoarrays: A Modular Catalyst Enabling High-Performance Oxygen Evolution
NiFe	1.0 M KOH	250 mV	45 h	0.95	Oxygen vacancies and surface reconstruction on NiFe LDH@Ni(OH)2 heterojunction synergistically triggering oxygen evolution and urea oxidation reaction
FeCoMo	1.0 M KOH	239 mV	48 h	0.95	Attractive Electron Delocalization Behavior of FeCoMoPB Amorphous Nanoplates for Highly Efficient Alkaline Water Oxidation
NiFeMoB	1.0 M KOH	220 mV	40 h	0.95	Amorphous Multimetal Alloy Oxygen Evolving Catalysts
FeCoNi	1.0 M KOH	274 mV	24 h	0.95	An Efficient and Earth-Abundant Oxygen-Evolving Electrocatalyst Based on Amorphous Metal Borides
NiFeSn	1.0 M KOH	253 mV	12 h	0.95	Electrodeposition of self-supported Ni–Fe–Sn film on Ni foam: An efficient electrocatalyst for oxygen evolution reaction
NiFe	1.0 M KOH	259 mV	12 h	0.8	Enhancing Oxygen Evolution Reaction at High Current Densities on Amorphous-Like Ni–Fe–S Ultrathin Nanosheets via Oxygen Incorporation and Electrochemical Tuning
NiFeMo	1.0 M KOH	260 mV	24 h	0.9	Environmentally-Friendly Exfoliate and Active Site Self-Assembly: Thin 2D/2D Heterostructure Amorphous Nickel–Iron Alloy on 2D Materials for Efficient Oxygen Evolution Reaction
NiFe	1.0 M KOH	265 mV	20 h	1	Nickel iron boride nanosheets on rGO for active electrochemical water oxidation
FeCo	1.0 M KOH	290 mV	35 h	0.67	Porous amorphous FeCo alloys as pre-catalysts for promoting the oxygen evolution reaction
FeCoNiSiB	1.0 M KOH	230 mV	50 h	0.94	Nanostructured amorphous Fe29Co27Ni23Si9B12 high-entropy-alloy: an efficient electrocatalyst for oxygen evolution reaction
FeCo	1.0 M KOH	288 mV	10 h	0.95	Tuning Electronic Structures of Nonprecious Ternary Alloys Encapsulated in Graphene Layers for Optimizing Overall Water Splitting Activity
NiFe	1.0 M NaOH	224 mV	20 h	0.985	Self-Supported FeNi-P Nanosheets with Thin Amorphous Layers for Efficient Electrocatalytic Water Splitting
NiFe	1.0 M KOH	281 mV	17 h	0.9	Homogeneously Distributed NiFe Alloy Nanoparticles on 3D Carbon Fiber Network as a Bifunctional Electrocatalyst for Overall Water Splitting
NiFe	1.0 M KOH	216 mV	20 h	0.95	Amorphous NiFe Nanotube Arrays Bifunctional Electrocatalysts for Efficient Electrochemical Overall Water Splitting
FeCo	1.0 M KOH	250 mV	11 h	1	High-performance Fesingle bondCosingle bondP alloy catalysts by electroless deposition for overall water splitting
CoFe	1.0 M KOH	285 mV	15 h	0.9	Two-Step Synthesis of Cobalt Iron Alloy Nanoparticles Embedded in Nitrogen-Doped Carbon Nanosheets/Carbon Nanotubes for the Oxygen Evolution Reaction
CoTi	1.0 M KOH	361 mV	20 h	0.9	Electrodeposition of cobalt-sulfide nanosheets film as an efficient electrocatalyst for oxygen evolution reaction
FeCoNi	1.0 M KOH	249 mV	10 h	0.9	Understanding the incorporating effect of Co2+/Co3+ in NiFe-layered double hydroxide for electrocatalytic oxygen evolution reaction
FeCoNi	1.0 M KOH	312 mV	80 h	0.9	NiFe Layered Double Hydroxide Nanoparticles on Co,N-Codoped Carbon Nanoframes as Efficient Bifunctional Catalysts for Rechargeable Zinc–Air Batteries
CoSeNiFe	1.0 M KOH	277 mV	17 h	0.949	Metal–Organic Framework-Derived Hierarchical (Co,Ni)Se2@NiFe LDH Hollow Nanocages for Enhanced Oxygen Evolution
FeNi	1.0 M KOH	316 mV	14 h	0.87	Strongly Coupled FeNi Alloys/NiFe2O4@Carbonitride Layers-Assembled Microboxes for Enhanced Oxygen Evolution Reaction
FeCoNi	1.0 M KOH	258 mV	100 h	0.9	Polymetallic phosphides evolved from MOF and LDH dual-precursors for robust oxygen evolution reaction in alkaline and seawater media
FeCoNi	1.0 M KOH	193 mV	12 h	0.95	Electrodeposition-derived defect-rich heterogeneous trimetallic sulfide/hydroxide nanotubes/nanobelts for efficient electrocatalytic oxygen production
CrMnFeNiCo	1.0 M KOH	226 mV	60 h	0.949	Multi-metal phosphide as bi-functional electrocatalyst for enhanced water splitting performance
NiCoZn	1.0 M KOH	260 mV	7 h	0.949	Mesoporous nanostructures of NiCo-LDH/ZnCo2O4 as an efficient electrocatalyst for oxygen evolution reaction
NiFeZn	1.0 M KOH	203 ​mV	100 h	0.949	Unveiling the role of Zn dopants in NiFe phosphide nanosheet for oxygen evolution reaction
CoSe	1.0 M KOH	245 ​mV	50 h	0.949	CoSe2 nanocrystals embedded into carbon framework as efficient bifunctional catalyst for alkaline seawater splitting
FeNiNb	6 M KOH	248 mV	18 h	0.949	Amorphous FeNiNbPC nanoprous structure for efficient and stable electrochemical oxygen evolution
NiCo	1.0 M KOH	370 mV	12 h	0.949	Insight into improved oxygen evolution reaction on electronic modulation of phosphorus doped NiCo2O4
MnNiCo	1.0 M KOH	220 mV	60 h	0.949	Mn-doped NiCo2S4 nanosheet array as an efficient and durable electrocatalyst for oxygen evolution reaction
CoNi	1.0 M KOH	243 mV	20 h	0.9	Flower-like CoNi2S4/Ni3S2 nanosheet clusters on nickel foam as bifunctional electrocatalyst for overall water splitting
SeNiFe	1.0 M KOH	285 mV	24 h	0.95	Hierarchical nickle-iron layered double hydroxide composite electrocatalyst for efficient oxygen evolution reaction
NiFeCu	1.0 M KOH	285 mV	100 h	0.95	Branch-leaf-shaped CuNi@NiFeCu nanodendrites as highly efficient electrocatalysts for overall water splitting
CrFeCoNi	1.0 M KOH	196 mV	120 h	0.9	Engineering Microdomains of Oxides in High-Entropy Alloy Electrodes toward Efficient Oxygen Evolution
NiFe	1.0 M KOH	220 mV	16 h	0.95	Preparation of nickel-iron hydroxides by microorganism corrosion for efficient oxygen evolution
FeCoNiMg	1.0 M KOH	254 mV	3 h	1	A high-performance oxygen evolution electrode of nanoporous Ni-based solid solution by simulating natural meteorites
NiFeCo	1.0 M KOH	244 mV	20 h	0.9	Self-supporting amorphous nanoporous NiFeCoP electrocatalyst for efficient overall water splitting
NiCoFeMoMn	1.0 M KOH	243 mV	230 h	0.95	A freestanding nanoporous NiCoFeMoMn high-entropy alloy as an efficient electrocatalyst for rapid water splitting
FeMnCoCr	1.0 M KOH	247 mV	60 h	0.95	Corrosion engineering boosting bulk Fe50Mn30Co10Cr10 high-entropy alloy as high-efficient alkaline oxygen evolution reaction electrocatalyst
CoCrFeNiMo	1.0 M KOH	220 mV	24 h	1	Microwave sintered porous CoCrFeNiMo high entropy alloy as an efficient electrocatalyst for alkaline oxygen evolution reaction
FeCoNiCrNb	0.1 M KOH	288 mV	30 h	1	High Entropy Intermetallic–Oxide Core–Shell Nanostructure as Superb Oxygen Evolution Reaction Catalyst
ZnNi	0.1 M KOH	325 mV	24 h	0.983	Tailoring the d-band center by intermetallic charge-transfer manipulation in bimetal alloy nanoparticle confined in N-doped carbon nanobox for efficient rechargeable Zn-air battery
NiTeCoFe	1.0 M KOH	218 mV	50 h	0.95	Interface engineering of NiTe@CoFe LDH for highly efficient overall water-splitting
CoNi	1.0 M KOH	300 mV	40 h	0.9	Rational construction of core-branch Co3O4@CoNi-layered double hydroxide nanoarrays as efficient electrocatalysts for oxygen evolution reaction
NiIrRuAl	0.1 M HClO4	237 mV	100 h	0.95	Multimetallic nanostructures for electrocatalytic oxygen evolution reaction in acidic media
FeNi	1.0 M KOH	241 mV	10 h	78.5%	Heteroatom Ni alloyed pyrite-phase FeS2 as a pre-catalyst for enhanced oxygen evolution reaction
FeNi	1.0 M KOH	279 mV	24 h	0.987	Electrochemical synergy between FeNi nanoalloy@tungsten carbide on N-doped graphitized carbon layers as an excellent electrocatalyst for oxygen evolution reaction
NiCoFeMo	1.0 M KOH	270 mV	70 h	0.9	Oriented interlayered charge transfer in NiCoFe layered double hydroxide/MoO3 stacked heterostructure promoting the oxygen-evolving behavior
NiCoFeMo	1.0 M KOH	240 mV	100 h	0.95	Self-sacrificial reconstruction of MoO42− intercalated NiFe LDH/Co2P heterostructures enabling interfacial synergies and oxygen vacancies for triggering oxygen evolution reaction
IrNiTa	1.0 M KOH	266 mV	10 h	0.95	Mesoporous IrNiTa metal glass ribbon as a superior self-standing bifunctional catalyst for water electrolysis
MnFe	1.0 M KOH	295 mV	16 h	0.978	Interfacial electronic coupling in Mn3O4/C@FeOOH nano-octahedrals regulates intermediate adsorption for highly efficient
FeNi	1.0 M KOH	238 mV	55 h	0.95	Synergistic coupling of FeNi3 alloy with graphene carbon dots for advanced oxygen evolution reaction electrocatalysis
CoTeNi	1.0 M KOH	280 mV	18 h	0.95	oTe2–NiTe2 heterojunction directly grown on CoNi alloy foam for efficient oxygen evolution reaction
CoMo	1.0 M KOH	283 mV	45 h	0.95	Interface engineering of Co2N0.67/CoMoO4 heterostructure nanosheets as a highly active electrocatalyst for overall water splitting and Zn-H2O cell
IrW	0.5 M H2SO4	250 mV	8 h	0.95	Iridium–Tungsten Alloy Nanodendrites as pH-Universal Water-Splitting Electrocatalysts
CeCo	1.0 M KOH	376 mV	24 h	0.8	Ce doped Co(PO3)2@NF bifunctional electrocatalyst for water decomposition
NiFe	1.0 M KOH	294 mV	10 h	0.9	Enhanced Oxygen Evolution Reaction Activity by Encapsulating NiFe Alloy Nanoparticles in Nitrogen-Doped Carbon Nanofibers
FeCoNi	1.0 M KOH	290 mV	40 h	0.962	Multimetallic electrocatalysts of FeCoNi nanoalloy embedded in multilayered carbon nanotubes for oxygen reduction reaction and flexible Zn-air battery
MnNiCu	1.0 M KOH	317 mV	30 h	0.95	Three-dimensional hierarchical nanoporous (Mn,Ni)-Doped Cu2S architecture towards high-efficiency overall water splitting
CuNi	1.0 M KOH	198 mV	40 h	0.9	Interfacial electronic structure and electrocatalytic performance modulation in Cu0.81Ni0.19 nanoflowers by heteroatom doping engineering using ionic liquid dopant
MnFe	1.0 M KOH	275 mV	27 h	1	Mesoporous Mn–Fe oxyhydroxides for oxygen evolution
SnMoNi	1.0 M KOH	290 mV	300 h	0.983	SnO2@MoS2 heterostructures grown on nickel foam as highly efficient bifunctional electrocatalyst for overall water splitting in alkaline media
AgCo	1.0 M KOH	170 mV	27 h	0.931	Silver-decorated amorphous cobalt hydr(oxy)oxide as highly active catalyst for oxygen evolution reaction
CoMo	1.0 M KOH	336 mV	8 h	0.95	Electrocatalyst nanoarchitectonics with molybdenum-cobalt bimetallic alloy encapsulated in nitrogen-doped carbon for water splitting reaction
NiIr	1.0 M KOH	277 mV	25 h	0.9	Controllable fabrication of a nickel–iridium alloy network by galvanic replacement engineering for high-efficiency electrocatalytic water splitting
MoAg	1.0 M KOH	330 mV	15 h	0.946	Mo–Ag nanocomposite catalysts for the oxygen evolution reaction
NiFeMo	1.0 M KOH	250 mV	50 h	0.95	Experimental and Theoretical Insights into Transition-Metal (Mo, Fe) Codoping in a Bifunctional Nickel Phosphide Microsphere Catalyst for Enhanced Overall Water Splitting
NiVRu	1.0 M KOH	190 mV	600 h	0.95	Atomic and electronic modulation of self-supported nickel-vanadium layered double hydroxide to accelerate water splitting kinetics
CoCeNi	1.0 M KOH	286 mV	30 h	0.95	Facile synthesis of Co and Ce dual-doped Ni3S2 nanosheets on Ni foam for enhanced oxygen evolution reaction
CoNbMoTi	1.0 M KOH	260.0 mV	60 h	0.892	Hierarchical Co and Nb dual-doped MoS2 nanosheets shelled micro-TiO2 hollow spheres as effective multifunctional electrocatalysts for HER, OER, and ORR
RuNiCo	1.0 M KOH	290 mV	10 h	0.99	Dual-doping of ruthenium and nickel into Co3O4 for improving the oxygen evolution activity
CoFe	1.0 M KOH	232 mV	40 h	1	Water-Plasma-Enabled Exfoliation of Ultrathin Layered Double Hydroxide Nanosheets with Multivacancies for Water Oxidation
NiFe	1.0 M KOH	310 mV	10 h	0.83	Water-Plasma Assisted Synthesis of Oxygen-Enriched Ni–Fe Layered Double Hydroxide Nanosheets for Efficient Oxygen Evolution Reaction
PrBaCo	1.0 M KOH	360 mV	4 h	1	The role of oxygen vacancies in water oxidation for perovskite cobalt oxide electrocatalysts: are more better?
LaSrCo	1.0 M KOH	326 mV	15 h	1	Engineering Oxygen Vacancies into LaCoO3 Perovskite for Efficient Electrocatalytic Oxygen Evolution
NiFe	1.0 M KOH	250 mV	11 h	0.875	Flame-Engraved Nickel–Iron Layered Double Hydroxide Nanosheets for Boosting Oxygen Evolution Reactivity
IrNi	0.1 m HClO4	279 mV	11 h	0.9	Ultrafine IrNi Bimetals Encapsulated in Zeolitic Imidazolate Frameworks-Derived Porous N-Doped Carbon for Boosting Oxygen Evolution in Both Alkaline and Acidic Electrolytes
NiIr	1 M KOH	271.8 mV	24 h	0.95	Facile fabrication of ultrafine nickel-iridium alloy nanoparticles/graphene hybrid with enhanced mass activity and stability for overall water splitting
RuCu	1 M KOH	234 mV	12 h	1	Channel-Rich RuCu Nanosheets for pH-Universal Overall Water Splitting Electrocatalysis
NiRu	1 M KOH	278 mV	10 h	1	Ultrafine carbon encapsulated NiRu alloys as bifunctional electrocatalysts for boosting overall water splitting: morphological and electronic modulation through minor Ru alloying
FeIr	1 M KOH	200 mV	504 h	0.95	Bimetallic iron-iridium alloy nanoparticles supported on nickel foam as highly efficient and stable catalyst for overall water splitting at large current density
NiCoFeMoMn	1 M KOH	243 mV	375 h	0.95	A freestanding nanoporous NiCoFeMoMn high-entropy alloy as an efficient electrocatalyst for rapid water splitting
NiMo	1 M KOH	186 mV	25 h	0.9	Engineering active sites on hierarchical transition bimetal oxides/sulfides heterostructure array enabling robust overall water splitting
CoFe	1 M KOH	250 mV	1.7 h	1	Hierarchical CoP–FeP Branched Heterostructures for Highly Efficient Electrocatalytic Water Splitting
CoSeMo	1 M KOH	309 mV	12 h	0.8	Well-defined CoSe2@MoSe2 hollow heterostructured nanocubes with enhanced dissociation kinetics for overall water splitting
NiFe	1.0 M KOH	240 mV	120 h	0.95	Amorphous-crystalline heterostructure for simulated practical water splitting at high-current–density
NiSeCoFe	1.0 M KOH	203 mV	80 h	0.95	Interfacial electronic modulation on heterostructured NiSe@CoFe LDH nanoarrays for enhancing oxygen evolution reaction and water splitting by facilitating the deprotonation of OH to O
NiCo	1.0 M KOH	284 mV	48 h	0.943	Ultrathin NiCo2Px nanosheets strongly coupled with CNTs as efficient and robust electrocatalysts for overall water splitting
NiSe	1.0 M KOH	270 mV	300 h	0.9	Lattice-Strain Engineering of Homogeneous NiS0.5Se0.5 Core–Shell Nanostructure as a Highly Efficient and Robust Electrocatalyst for Overall Water Splitting
CoFe	1.0 M KOH	200 mV	50 h	1	Low-overpotential overall water splitting by a cooperative interface of cobalt-iron hydroxide and iron oxyhydroxide
AgNaCo	1.0 M KOH	236 mV	30 h	0.9	Lattice strain and atomic replacement of CoO6 octahedra in layered sodium cobalt oxide for boosted water oxidation electrocatalysis
NiAl	1.0 M KOH	280 mV	180 h	0.95	Strain-modulated Ni3Al alloy promotes oxygen evolution reaction
NiCo	1.0 M KOH	319 mV	50 h	1	Stacking faults triggered strain engineering of ZIF-67 derived Ni-Co bimetal phosphide for enhanced overall water splitting
NiFe	1.0 M KOH	250 mV	90 h	0.86	Alloy-strain-output induced lattice dislocation in Ni3FeN/Ni3Fe ultrathin nanosheets for highly efficient overall water splitting
RuZnIn	1.0 M KOH	300 mV	200 h	0.9	Lattice-strained metal–organic-framework arrays for bifunctional oxygen electrocatalysis
CuFe	1.0 M KOH	218 mV	100 h	0.9	A Robust Nonprecious CuFe Composite as a Highly Efficient Bifunctional Catalyst for Overall Electrochemical Water Splitting
NiCuCoFe	1.0 M KOH	251 ​mV	72 ​h	0.8	Dual elemental modulation in cationic and anionic sites of the multi-metal Prussian blue analogue pre-catalysts for promoted oxygen evolution reaction
CoFeZn	1.0 M KOH	343 mV	12 h	0.9	Constructing highly active Co sites in Prussian blue analogues for boosting electrocatalytic water oxidation
NiFe	1.0 M KOH	290 mV	10 h	0.83	Bimetallic phosphide hollow nanocubes derived from a prussian-blue-analog used as high-performance catalysts for the oxygen evolution reaction
PdCoNi	1.0 M KOH	309 mV	50 h	0.973	Pd Ion-Exchange and Ammonia Etching of a Prussian Blue Analogue to Produce a High-Performance Water-Splitting Catalyst
CoFe	1.0 M KOH	275 mV	10 h	0.8746	Prussian blue analog-derived 2D ultrathin CoFe2O4 nanosheets as high-activity electrocatalysts for the oxygen evolution reaction in alkaline and neutral media
NiFePt	1.0 M KOH	333 mV	12 h	0.9	Ni–Fe nanocubes embedded with Pt nanoparticles for hydrogen and oxygen evolution reactions
CoSe	1.0 M KOH	335 mV	4 h	0.91	Prussian blue analogue metal organic framework-derived CoSe2 nanoboxes for highly efficient oxygen evolution reaction
CoFe	1.0 M KOH	300 mV	12 h	0.8	Fe-doped CoP core–shell structure with open cages as efficient electrocatalyst for oxygen evolution
CoFe	1.0 M KOH	300 mV	20 h	0.8	Three-dimensional porous ultrathin carbon networks reinforced PBAs-derived electrocatalysts for efficient oxygen evolution
CoFe	1.0 M KOH	330 mV	12 h	0.8	Boosting the activity of Prussian_x0002_blue analogue as efcient electrocatalyst for water and urea oxidation
CoGa	1.0 M KOH	260 ​mV	70 h	0.9	A New Defect-Rich CoGa Layered Double Hydroxide as Efficient and Stable Oxygen Evolution Electrocatalyst
FeCoCrNi	1.0 M KOH	300 mV	20 h	0.93	Lattice oxygen activation enabled by high-valence metal sites for enhanced water oxidation
Ir–Co	1 M HClO4	281 ​mV	14 h	0.987	Hollow IrCo Nanoparticles for High-Performance Overall Water Splitting in an Acidic Medium
CoFe	1.0 M KOH	248 mV	11 h	0.95	Iron-doped novel Co-based metal–organic frameworks for preparation of bifunctional catalysts with an amorphous structure for OER/HER in alkaline solution
NiFe	1 M KOH + 0.5 M NaCl	227 ​mV	24 h	0.95	Preferential Adsorption of Hydroxide Ions onto Partially Crystalline NiFe-Layered Double Hydroxides Leads to Efficient and Selective OER in Alkaline Seawater
PbRu	0.6 M NaCl and 0.6 M NaClO4	500 ​mV	1 h	0.95	Selective Seawater Splitting Using Pyrochlore Electrocatalyst
NiFe	1 M KOH+0.5 M NaCl	269 mV	27 h	0.95	Heterogeneous lamellar-edged Fe-Ni(OH)2/Ni3S2 nanoarray for efficient and stable seawater oxidation
NiFeMo	1 M KOH	277 ​mV	24 h	0.95	Non-noble metal-nitride based electrocatalysts for high-performance alkaline seawater electrolysis
NiFe	1 M KOH	261 ​mV	24 h	0.8	Heterogeneous Bimetallic Phosphide Ni2P-Fe2P as an Efficient Bifunctional Catalyst for Water/Seawater Splitting
CoFe	1 M KOH + 0.5 M NaCl	294 mV	20 h	0.7	Highly Efficient and Selective Metal Oxy-Boride Electrocatalysts for Oxygen Evolution from Alkali and Saline Solutions
NiSi	1 M KOH	296 mV	35 h	0.95	Self-adaptive evolution of nickel silicide nanowires for the enhancement of bifunctional electrocatalytic activities
CeNd	1 M KOH	346 mV	60 h	0.95	Electrochemical Performance Evaluation of Bimetallic Sulfide Nanocomposite with Fullerene (CeNdS/C60) for Efficient Oxygen Evolution Reaction (OER)
NiFe	0.1 M KOH	290 mV	10 h	1	NiFe nanoparticles embedded N-doped carbon nanotubes as high-efficient electrocatalysts for wearable solid-state Zn-air batteries
CoFe	1 M KOH	297 mV	10 h	0.9	Metal–Organic Framework Hybrid-Assisted Formation of Co3O4/Co-Fe Oxide Double-Shelled Nanoboxes for Enhanced Oxygen Evolution
CoFe	1 M KOH	235 mV	12 h	1	Controlled Synthesis of Hollow Bimetallic Prussian Blue Analog for Conversion into Efficient Oxygen Evolution Electrocatalyst
FeNi	1 M KOH	240 mV	35 h	0.9	Construction of an iron and oxygen co-doped nickel phosphide based on MOF derivatives for highly efficient and long-enduring water splitting
NiFeCo	1 M KOH	251 mV	24 h	0.95	Double functionalization of N-doped carbon carved hollow nanocubes with mixed metal phosphides as efficient bifunctional catalysts for electrochemical overall water splitting
CoFe	1 M KOH	198 mV	100 h	0.95	Rational construction of macroporous CoFeP triangular plate arrays from bimetal–organic frameworks as high-performance overall water-splitting catalysts
NiFe	1 M KOH	271 mV	10 h	0.94	Porous Structured Ni–Fe–P Nanocubes Derived from a Prussian Blue Analogue as an Electrocatalyst for Efficient Overall Water Splitting
FeCo	1 M KOH	190 mV	30 h	0.95	e-CoP Electrocatalyst Derived from a Bimetallic Prussian Blue Analogue for Large-Current-Density Oxygen Evolution and Overall Water Splitting
NiFe	1 M KOH	232 mV	20 h	0.9	Metal-Organic-Framework-Derived Nitrogen-Doped Hybrid Nickel-Iron-Sulfide Architectures on Carbon Cloth as Efficient Electrocatalysts for the Oxygen Evolution Reaction
NiCo	1 M KOH	370 mV	20 h	0.864	“One for two” strategy to prepare MOF-derived NiCo2S4 nanorods grown on carbon cloth for high-performance asymmetric supercapacitors and efficient oxygen evolution reaction
NiCoTi	1 M KOH	365 mV	5.5 h	0.95	Metal–Organic Framework-Derived Nickel–Cobalt Sulfide on Ultrathin Mxene Nanosheets for Electrocatalytic Oxygen Evolution
NiFe	1 M KOH	292 mV	30 h	0.95	A practical-oriented NiFe-based water-oxidation catalyst enabled by ambient redox and hydrolysis co-precipitation strategy
NiCo	1 M KOH	280 mV	14 h	0.95	Amorphous NiMS (M: Co, Fe or Mn) holey nanosheets derived from crystal phase transition for enhanced oxygen evolution in water splitting
FeCo	1 M KOH	215 mV	45 h	0.95	Metal-organic framework derived Fe-Co-CN/reduced graphene oxide for efficient HER and OER
NiFe	1 M KOH	296 mV	8 h	0.9	Laser-Induced Graphene from Wood Impregnated with Metal Salts and Use in Electrocatalysis
ZnCoNi	1 M KOH	252 mV	100 h	0.767	Unveiling the role of counter-anions in amorphous transition metal-based oxygen evolution electrocatalysts
CoCu	1 M KOH	285 mV	12 h	0.9	Theoretical and experimental investigations of Co-Cu bimetallic alloys-incorporated carbon nanowires as an efficient bi-functional electrocatalyst for water splitting
NiCuSe	1 M KOH	200 mV	100 h	0.992	Engineering Ni(OH)x/(Ni, Cu)Se2 heterostructure nanosheet arrays for highly-efficient water oxidation
NiMo	1 M KOH	258 mV	24 h	0.8	Novel three-dimensional Ni2P-MoS2 heteronanosheet arrays for highly efficient electrochemical overall water splitting
NiCoFe	1 M KOH	194 mV	10 h	0.95	Bimetallic co-doping engineering over nickel-based oxy-hydroxide enables high-performance electrocatalytic oxygen evolution
NiCu	1 M KOH	290 mV	36 h	0.9	Ultrarapid synthesis Ni-Cu bifunctional electrocatalyst by self-etching electrodeposition for high-performance water splitting reaction
NiFe	1 M KOH	262 mV	150 h	0.8	Metal–organic-framework-derived porous 3D heterogeneous NiFex/NiFe2O4@NC nanoflowers as highly stable and efficient electrocatalysts for the oxygen-evolution reaction
FeCo	1 M KOH	257 mV	50 h	0.9718	Well-aligned arrangement CoFe nanoparticles assisted with cellulose nanofibrils for efficient oxygen evolution reaction
NiCu	1 M KOH	280 mV	6 h	1	Highly efficient ternary CuP2/Ni1−xCux‒P@g-C3N4 nanostructure for improved hydrogen and oxygen evolution reactions
FeNi	1 M KOH	201 mV	50 h	0.95	Operando capturing of surface self-reconstruction of Ni3S2/FeNi2S4 hybrid nanosheet array for overall water splitting
RuNiFe	1 M KOH	222 mV	20 h	0.95	Synergistic electronic interaction between ruthenium and nickel-iron hydroxide for enhanced oxygen evolution reaction
AgNiAl	1 M KOH	259 mV	36 h	0.9	Rationally Designed Ag@polymer@2-D LDH Nanoflakes for Bifunctional Efficient Electrochemical Sensing of 4-Nitrophenol and Water Oxidation Reaction
ZrNi	1 M KOH	350 mV	12 h	0.74	Metal-substituted zirconium diboride (Zr1-xTMxB2; TM = Ni, Co, and Fe) as low-cost and high-performance bifunctional electrocatalyst for water splitting
MoNiFe	1 M KOH	257 mV	18 h	0.85	Trimetallic Molybdate Nanobelts as Active and Stable Electrocatalysts for the Oxygen Evolution Reaction
RuNi	0.5 M H2SO4	252 mV	10 h	0.95	pH-Universal Water Splitting Catalyst: Ru-Ni Nanosheet Assemblies
NiFe	0.1 M KOH	329 mV	45 h	1	Synthesis of Ultrasmall, Homogeneously Distributed Ni3Fe Alloy Nanoparticles on N-Doped Porous Graphene as a Bifunctional Electrocatalyst for Rechargeable Flexible Solid Zinc-Air Batteries
FeMn	1 M KOH	209 mV	3 h	0.95	Loose spherical FeOOH/MnO nanoarrays from a simple in situ hydrothermal method for enhanced oxygen evolution electrocatalysis
IrNi	1 M KOH	245 mV	25 h	0.95	Ni optimizes Ir reaction pathway through IrNi alloy synergistic effect to improve overall water splitting efficiency
NiFeCoSe	1 M KOH	228 mV	24 h	0.95	NiFeCo selenide nanosheets as promising electrocatalysts for oxygen evolution reaction
NiFe	1 M KOH	134 mV	45 h	1	Sandwich structured Fe3O4/NiFe LDH/Fe3O4 as a bifunctional electrocatalyst with superior stability for highly sustained overall water splitting
NiRu	1 M KOH	245 mV	20 h	0.8	Nickel-decorated RuO2 nanocrystals with rich oxygen vacancies for high‐efficiency overall water splitting
NiCo	1 M KOH	280 mV	24 h	0.9	Plasma-Assisted Synthesis of NiCoP for Efficient Overall Water Splitting
FeCo	1 M KOH	333.5 mV	100 h	0.74	Anion and Cation Modulation in Metal Compounds for Bifunctional Overall Water Splitting
NiCo	1 M KOH	270 mV	75 h	0.9	Mechanistic Insights on Ternary Ni2−xCoxP for Hydrogen Evolution and Their Hybrids with Graphene as Highly Efficient and Robust Catalysts for Overall Water Splitting
NiCo	1 M KOH	350 mV	100 h	1	From water reduction to oxidation: Janus Co-Ni-P nanowires as high-efficiency and ultrastable electrocatalysts for over 3000 h water splitting
NiSe	1 M KOH	242 mV	17 h	0.8	Ni3Se2 nanoforest/Ni foam as a hydrophilic, metallic, and self-supported bifunctional electrocatalyst for both H2 and O2 generations
MoNi	1 M KOH	218 mV	10 h	0.95	Interface Engineering of MoS2/Ni3S2 Heterostructures for Highly Enhanced Electrochemical Overall-Water-Splitting Activity
MoCo	0.5 M H2SO4	430 mV	12 h	0.78	When Cubic Cobalt Sulfide Meets Layered Molybdenum Disulfide: A Core–Shell System Toward Synergetic Electrocatalytic Water Splitting
CuNi	1 M KOH	228 mV	20 h	0.95	Boosting ethanol oxidation by NiOOH-CuO nano-heterostructure for energy-saving hydrogen production and biomass upgradin
FeNi	1 M KOH	352 mV	20 h	0.95	Nanoscale Heterogeneities of Non-Noble Iron-Based Metallic Glasses toward Efficient Water Oxidation at Industrial-Level Current Densities
FeNi	1 M KOH	251 mV	40 h	0.95	Facile construction of well-defined hierarchical NiFe2O4/NiFe layered double hydroxides with a built-in electric field for accelerating water splitting at the high current density
IrPdCu	0.1 M KOH	390 mV	10 h	0.95	High Valence M-Incorporated PdCu Nanoparticles (M = Ir, Rh, Ru) for Water Electrolysis in Alkaline Solution
NiSeCo	1 M KOH	287 mV	12 h	0.83	Optimizing the electronic structure of NiSe2/CoSe2 nanosheet arrays by phosphorus doping for high-efficiency oxygen evolution electrocatalysts
NiW	1 M KOH	270 mV	12 h	0.95	In situ interfacial engineering of nickel tungsten carbide Janus structures for highly efficient overall water splitting
FeNiSe	1 M KOH	257 mV	15 h	0.5	Fe doped NiSe2 nanoarrays to boost electrocatalytic oxygen evolution reaction
MoFeNi	1 M KOH	198 mV	200 h	0.95	Lignin-derived carbon-supported MoC–FeNi heterostructure as efficient electrocatalysts for oxygen evolution reaction
FeCoPd	1 M KOH	197 mV	100 h	0.95	Robust and promising hydrogen and oxygen evolution reactions by a nanostructured bifunctional FeCoPd alloy electrocatalyst
LaCoMo	1 M KOH	282 mV	20 h	0.857	Construction of La decorated CoMoP composite and its highly efficient electrocatalytic activity for overall water splitting in alkaline media
RuNiFe	1 M KOH	256 mV	50 h	1	Trace Ru atoms implanted into a Ni/Fe-based oxalate solid-solution-like with high-indexed facets for energy-saving overall seawater electrolysis assisted by hydrazine
NiFeCo	1 M KOH	196 mV	50 h	0.95	Composition-balanced trimetallic MOFs as ultra-efficient electrocatalysts for oxygen evolution reaction at high current densities
FeNi	1 M KOH	184 mV	84 h	1	Synergistic effect of multiple vacancies to induce lattice oxygen redox in NiFe-layered double hydroxide OER catalysts
MoFeNi	1 M KOH	340 mV	48 h	0.556	Fe/Ni bi-metallic organic framework supported 1T/2H MoS2 heterostructures as efficient bifunctional electrocatalysts for hydrogen and oxygen evolution
NiCo	1 M KOH	290 mV	20 h	0.9	Phosphorus modified hollow, porous Nickel-Cobalt oxides nanocubes with heterostructure for oxygen evolution reaction in alkaline
FeNi	0.05 M H2SO4	540 mV	30 h	0.95	Amorphous Metallic NiFeP: A Conductive Bulk Material Achieving High Activity for Oxygen Evolution Reaction in Both Alkaline and Acidic Media
FeGe	1 M KOH	272 mV	20 h	0.75	Intermetallic Fe6Ge5 formation and decay of a core–shell structure during the oxygen evolution reaction
FeSn	1 M KOH	273 mV	24 h	0.95	Enabling Iron-Based Highly Effective Electrochemical Water-Splitting and Selective Oxygenation of Organic Substrates through In Situ Surface Modification of Intermetallic Iron Stannide Precatalyst
NiGe	1 M KOH	228 mV	20 h	0.9	Facile Access to an Active γ-NiOOH Electrocatalyst for Durable Water Oxidation Derived From an Intermetallic Nickel Germanide Precursor
NiIrRuAl	0.1 M HClO4	237 mV	5 h	0.95	Hierarchically porous nickel–iridium–ruthenium–aluminum alloys with tunable compositions and electrocatalytic activities towards the oxygen/hydrogen evolution reaction in acid electrolyte
CoSn	1 M KOH	230 mV	16 h	0.81	Structurally Ordered Intermetallic Cobalt Stannide Nanocrystals for High-Performance Electrocatalytic Overall Water-Splitting
MnGa	1 M KOH	291 mV	24 h	0.867	Boosting Water Oxidation through In Situ Electroconversion of Manganese Gallide: An Intermetallic Precursor Approach
CoMoCu	1 M KOH	261 mV	10 h	0.8	Spontaneously separated intermetallic Co3Mo from nanoporous copper as versatile electrocatalysts for highly efficient water splitting
FeNi	1 M KOH	277 mV	20 h	0.95	Nitrogen-Doped carbon coupled FeNi3 intermetallic compound as advanced bifunctional electrocatalyst for OER, ORR and zn-air batteries
NiTa	0.50 M H2SO4	570 mV	66 h	0.95	Intermetallic Ni2Ta Electrocatalyst for the Oxygen Evolution Reaction in Highly Acidic Electrolytes
IrRuTe	0.5 M H2SO4	220 mV	20 h	1	Strong Electronic Coupling between Ultrafine Iridium–Ruthenium Nanoclusters and Conductive, Acid-Stable Tellurium Nanoparticle Support for Efficient and Durable Oxygen Evolution in Acidic and Neutral Media
NiAl	1 M KOH	280 mV	180 h	0.95	Strain-modulated Ni3Al alloy promotes oxygen evolution reaction
FeNiCu	1 M KOH	280 mV	24 h	0.95	A surface-modified antiperovskite as an electrocatalyst for water oxidation
NiZn	1 M KOH	283 mV	16 h	0.95	Ultra-small intermetallic NiZn nanoparticles: a non-precious metal catalyst for efficient electrocatalysis
CuSn	1 M KOH	384 mV	40 h	0.9	Advanced Cu3Sn and Selenized Cu3Sn@Cu Foam as Electrocatalysts for Water Oxidation under Alkaline and Near-Neutral Conditions
AgNi	1 M KOH	260 ​mV	10 h	1	Engineering heterostructure of bimetallic nickel-silver sulfide as an efficient electrocatalyst for overall water splitting in alkaline media
NiRu	1 M KOH	278 mV	10 h	1	Ultrafine carbon encapsulated NiRu alloys as bifunctional electrocatalysts for boosting overall water splitting: morphological and electronic modulation through minor Ru alloying
NiFe	1 M KOH	203 ​mV	48 h	0.8	Amine-assisted synthesis of the Ni3Fe alloy encapsulated in nitrogen-doped carbon for high-performance water splitting
LaSrCoMo	1 M KOH	307 mV	24 h	0.9	N-doped graphene quantum dots as charge-transfer-bridge at LaSrCoO/MoSe2 heterointerfaces for enhanced water splitting
CoMo	1 M KOH	217 mV	16 h	0.887	Defect and interface engineering of templated synthesis of hollow porous Co3O4/CoMoO4 with highly enhanced electrocatalytic activity for oxygen evolution reaction
CuNiCoLa	1 M KOH	254 mV	24 h	0.9	Core-shell nanoarray structured La doped Cu(OH)2@NiCo layered double hydroxide for oxygen evolution reaction
CoFe	1 M KOH	318 mV	17 h	1	Molten salt synthesis of ZIF derived CoFe alloy embedded in 2D ultrathin N-doped porous carbon nanosheets for efficient alkaline media oxygen electrocatalysis
BaNi	1 M KOH	253 mV	24 h	1	Combustion-derived BaNiO3 nanoparticles as a potential bifunctional electrocatalyst for overall water splitting
CoCu	1 M KOH	245 mV	24 h	0.95	Nanoporous CoCu layered double hydroxide nanoplates as bifunctional electrocatalyst for high performance overall water splitting
FeNi	1 M KOH	196 mV	50 h	0.986	Pyridinic-N doping carbon layers coupled with tensile strain of FeNi alloy for activating water and urea oxidation
FeNiCu	1 M KOH	244 mV	24 h	0.883	NiCu alloys anchored defect-rich NiFe layered double-hydroxides as efficient electrocatalysts for overall water splitting
CrMnFeCoNi	1 M KOH	295 mV	10 h	0.9	High-Entropy Metal Sulfide Nanoparticles Promise High-Performance Oxygen Evolution Reaction
FeCoMo	1 M KOH	282 mV	20 h	0.8	Multiscale structural optimization: Highly efficient hollow iron-doped metal sulfide heterostructures as bifunctional electrocatalysts for water splitting
NiSe	1 M KOH	330 mV	40 h	1	Facile construction of heterostructural Ni3(NO3)2(OH)4/CeO2 bifunctional catalysts for boosted overall water splitting
FeNi	1.0 ​M KOH	223 ​mV	20 h	0.95	Dual-phase synergy with electron redistribution during NiFe-LDH/Ni3S4 hollow nanoprisms for enhanced oxygen evolution
FeNiMo	1 M KOH	288 mV	12 h	0.95	Transition-metal alloy electrocatalysts with active sites modulated by metal-carbide heterophases for efficient oxygen evolution
CoRuCr	1 M KOH	272 mV	100 h	0.95	Synergizing Cobalt Ruthenium Alloy with Chromium Oxyhydroxide for Highly Efficient Electrocatalytic Water Splitting
NiCoCu	1 M KOH	276 mV	10 h	0.95	Facile electrochemical synthesis of Ni-Co-B film on Cu sheet for dual-electrocatalysis of hydrogen and oxygen evolution reactions
NiFeCo	1 M KOH	170 mV	70 h	1	Chemical transformation approach for high-performance ternary NiFeCo metal compound-based water splitting electrodes
AuNi	1 M Na2SO4	335 mV	30 h	0.5	Tuning the Electronic Structure of a Ni-Vacancy-Enriched AuNi Spherical Nanoalloy via Electrochemical Etching for Water Oxidation Studies in Alkaline and Neutral Media
FeNi	1 M KOH	239 mV	100 h	0.952	Preparation of metal-organic framework from in situ self-sacrificial stainless-steel matrix for efficient water oxidation
FeMoTe	1 M KOH	300 mV	10 h	0.95	Fe doped Mo/Te nanorods with improved stability for oxygen evolution reaction
FeCoWAu	1 M KOH	315 mV	12 h	1	Homogeneously dispersed multimetal oxygen-evolving catalysts
FeCoRu	1 M KOH	198 mV	24 h	0.986	Boosting oxygen evolution of single-atomic ruthenium through electronic coupling with cobalt-iron layered double hydroxides
AuNiFe	1 M KOH	237 mV	20 h	0.8	Single-Atom Au/NiFe Layered Double Hydroxide Electrocatalyst: Probing the Origin of Activity for Oxygen Evolution Reaction
NiFeW	1 M KOH	247 mV	50 h	0.95	Facile synthesis of nanoparticle-stacked tungsten-doped nickel iron layered double hydroxide nanosheets for boosting oxygen evolution reaction
CuNiFe	1 M KOH	224 mV	12 h	1	Amorphous Nanocages of Cu-Ni-Fe Hydr(oxy)oxide Prepared by Photocorrosion For Highly Efficient Oxygen Evolution
NiFeAl	1 M KOH	304 mV	18 h	0.95	The effects of Al substitution and partial dissolution on ultrathin NiFeAl trinary layered double hydroxide nanosheets for oxygen evolution reaction in alkaline solution
NiFeCr	1 M KOH	225 mV	6 h	0.95	Highly Active Trimetallic NiFeCr Layered Double Hydroxide Electrocatalysts for Oxygen Evolution Reaction
NiFeMn	1 M KOH	230 mV	40 h	0.96	Activating basal plane in NiFe layered double hydroxide by Mn2+ doping for efficient and durable oxygen evolution reaction
NiCoRu	1 M KOH	270 mV	55 h	0.95	In Situ Synthesis of Ternary NiCoRu-Based Layered Double Hydroxide by Chlorine Corrosion toward Electrocatalytic Water Oxidation
CoCrRu	0.1 M KOH	290 mV	12 h	0.95	Ruthenium-Doped Cobalt–Chromium Layered Double Hydroxides for Enhancing Oxygen Evolution through Regulating Charge Transfer
CoNi	1 M KOH	310 mV	12 h	0.95	Boosting oxygen evolution reaction activity by tailoring MOF-derived hierarchical Co–Ni alloy nanoparticles encapsulated in nitrogen-doped carbon frameworks
SrFeNiMo	0.1 M KOH	330 mV	16 h	0.95	Interface modulation of perovskite oxides to simultaneously enhance the activity and stability toward oxygen evolution reaction
FeCoNi	0.1 M KOH	458 mV	8.3 h	0.943	Enhanced Catalytic Performance of FeCoNi/N-Doped Carbon Nanospheres as Bifunctional Oxygen Catalysts
FeCo	1 M KOH	285 mV	24 h	0.97	FeCo nanoparticles with different compositions as electrocatalysts for oxygen evolution reaction in alkaline solution
FeCoNi	0.5 M KOH	400 mV	10 h	0.95	FeCoNi Alloy as Noble Metal-Free Electrocatalyst for Oxygen Evolution Reaction (OER)
FeCoNi	1.0 M KOH	235 mV	30 h	0.8	Amorphous aerogel of trimetallic FeCoNi alloy for highly efficient oxygen evolution
IrNiCo	0.1 M HClO4	220 mV	24 h	0.95	3D nanoporous iridium-based alloy microwires for efficient oxygen evolution in acidic media
NiIrRuAl	0.1 M HClO4	237 mV	5 h	0.95	Hierarchically porous nickel–iridium–ruthenium–aluminum alloys with tunable compositions and electrocatalytic activities towards the oxygen/hydrogen evolution reaction in acid electrolyte
FeCoNi	0.5 M H2SO4	497 mV	20 h	0.95	Enhanced electrocatalytic performance of FeNiCoP amorphous alloys as oxygen-evolving catalysts for electrolytic water splitting application
NiCoTi	1 M KOH	331 mV	150 h	0.82	Nanostructured Nickel–Cobalt–Titanium Alloy Grown on Titanium Substrate as Efficient Electrocatalyst for Alkaline Water Electrolysis
RuCoMo	1 M KOH	237 mV	25 h	1	Ultralow ruthenium loading Cobalt-molybdenum binary alloy as highly efficient and super-stable electrocatalyst for water splitting
MnIrCu	0.1 M HClO4	296 mV	12 h	0.95	Dopant-Assisted Control of the Crystallite Domain Size in Hollow Ternary Iridium Alloy Octahedral Nanocages toward the Oxygen Evolution Reaction
FeCoNi	1 M KOH	316 mV	5 h	1	Facile electrodeposition of ternary Ni-Fe-Co alloy nanostructure as a binder free, cost-effective and durable electrocatalyst for high-performance overall water splitting
FeNiMnCo	1 M KOH	242 mV	155 h	0.9	Fe-doped (Ni,Mn)Co2O4 nanorod arrays on Ni foam as highly efficient electrocatalyst for oxygen evolution reaction in alkaline and neutral conditions with superb long-term stability
FeCoNiRu	1 M KOH	243 mV	40 h	0.95	Self-Reconstructed Spinel Surface Structure Enabling the Long-Term Stable Hydrogen Evolution Reaction/Oxygen Evolution Reaction Efficiency of FeCoNiRu High-Entropy Alloyed Electrocatalyst
NiCoFe	1 M KOH	270 mV	10 h	0.9	Electrospinning synthesis of transition metal alloy nanoparticles encapsulated in nitrogen-doped carbon layers as an advanced bifunctional oxygen electrode
CoRuIr	0.1 M HClO4	235 mV	25 h	0.9	Transition-Metal-Doped RuIr Bifunctional Nanocrystals for Overall Water Splitting in Acidic Environments
FeCoNi	1.0 M NaOH	206 mV	24 h	0.8	Self-supported hierarchical porous FeNiCo-based amorphous alloys as high-efficiency bifunctional electrocatalysts toward overall water splitting
NiCoSn	1 M NaOH	270 mV	10 h	0.92	Electrodeposited Ni-Co-Sn alloy as a highly efficient electrocatalyst for water splitting
FeCuCoW	1 M KOH	247.3 mV	24 h	0.95	Facile electrodeposition synthesis and super performance of nano-porous Ni-Fe-Cu-Co-W high entropy alloy electrocatalyst
FeNiSe	1 M KOH	236 mV	24 h	0.95	Direct growth of Fe-incorporated NiSe microspheres on FeNi alloy foam as a highly efficient electrocatalyst for oxygen evolution reaction
FeCoNiMg	1 M KOH	235 mV	100 h	0.95	Bicontinuous Nanoporous Nitrogen/Carbon-Codoped FeCoNiMg Alloy as a High-Performance Electrode for the Oxygen Evolution Reaction
IrRuCu	0.1 M HClO4	250 mV	100 h	0.95	An IrRu alloy nanocactus on Cu2−xS@IrSy as a highly efficient bifunctional electrocatalyst toward overall water splitting in acidic electrolytes
FeCoNi	1 M KOH	280 mV	42 h	0.9	Construction of interconnected NiO/CoFe alloy nanosheets for overall water splitting
CrMnFeCoNi	1 M KOH	265 mV	30 h	1	A CrMnFeCoNi high entropy alloy boosting oxygen evolution/reduction reactions and zinc-air battery performance
CuCoNi	1 M KOH	240 mV	9 h	0.95	High-efficiency bifunctional electrocatalyst based on 3D freestanding Cu foam in situ armored CoNi alloy nanosheet arrays for overall water splitting
NiMoCo	1 M KOH	368 mV	50 h	0.95	NiMo/NiCo2O4 as synergy catalyst supported on nickel foam for efficient overall water splitting
PdCuIr	0.1 M HClO4	283 mV	15 h	0.95	Exclusive Strain Effect Boosts Overall Water Splitting in PdCu/Ir Core/Shell Nanocrystals
CoSeTi	1 M KOH	292 mV	25 h	0.95	An amorphous CoSe film behaves as an active and stable full water-splitting electrocatalyst under strongly alkaline conditions
NiFeMo	1 M KOH	318 mV	24 h	0.95	Tunable d-band center of a NiFeMo alloy with enlarged lattice strain enhancing the intrinsic catalytic activity for overall water-splitting
IrNiMoCoMn	1 M KOH	221 mV	20 h	1	Surface/interface engineering for fabricating hierarchical Ir doped NiMoO4 covered by CoMn layered double hydroxide toward oxygen evolution reaction
FeCoNiCrMn	1 M KOH	263 mV	24 h	0.995	Enhancement of oxygen evolution reaction performance of FeCoNiCrMn high entropy alloy thin film electrodes through in-situ reconstruction
CoNiFeSe	1 M KOH	273 mV	12h	0.9	Enhancement of oxygen evolution reaction by X-doped (X = Se, S, P) holey graphitic carbon shell encapsulating NiCoFe nanoparticles: a combined experimental and theoretical study
PtRuCu	1 M KOH	240 mV	80 h	0.9	In situ integration of ultrathin PtRuCu alloy overlayer on copper foam as an advanced free−standing bifunctional cathode for rechargeable Zn−air batteries
FeCoNi	1 M KOH	330 mV	12h	0.95	Ultrathin Fe-N-C Nanosheets Coordinated Fe-Doped CoNi Alloy Nanoparticles for Electrochemical Water Splitting
CoFeCu	1 M KOH	202 mV	10 h	0.95	Cu induced formation of dendritic CoFeCu ternary alloys on Ni foam for efficient oxygen evolution reaction
NiFeCu	1 M KOH	180 mV	20 h	1	Dendritic core-shell nickel-iron-copper metal/metal oxide electrode for efficient electrocatalytic water oxidation
NiFeCr	1 M KOH	231 mV	21 h	0.9033	Electronic coupling strategy to boost water oxidation efficiency based on the modelling of trimetallic hydroxides Ni1-x-yFexCry(OH)2: From theory to experiment
FeCoNi	1 M KOH	250 mV	100 h	0.95	Spinel-type ternary multimetal hybrid oxides with porous hierarchical structure grown on Ni foam as large-current-density water oxidation electrocatalyst
CrCoFe	1 M KOH	238 mV	20 h	0.9	Cr-Dopant Induced Breaking of Scaling Relations in CoFe Layered Double Hydroxides for Improvement of Oxygen Evolution Reaction
FeCoNi	1 M KOH	222 mV	24 h	0.95	NiCo/NiCo–OH and NiFe/NiFe–OH core shell nanostructures for water splitting electrocatalysis at large currents
FeNiMo	1 M KOH	142 mV	40 h	0.95	Trimetallic nanoplate arrays of Ni-Fe-Mo sulfide on FeNi3 foam: A highly efficient and bifunctional electrocatalyst for overall water splitting
NiFeSe	1 M KOH	292 mV	2.8 h	0.919	A NiFe/NiSe2 heterojunction bifunctional catalyst rich in oxygen vacancies introduced using dielectric barrier discharge plasma for liquid and flexible all-solid-state rechargeable Zn–air batteries
CoMCe	1 M KOH	239 mV	24 h	0.95	Co-Mn-S nanosheets decorated with CeO2: A highly active electrocatalyst toward oxygen evolution reaction
NiFeCo	1 M KOH	244 mV	20 h	0.9	Self-supporting amorphous nanoporous NiFeCoP electrocatalyst for efficient overall water splitting
FeNiSe	1 M KOH	242 mV	12h	0.95	One step synthesis of Fe4.4Ni17.6Se16 coupled NiSe foam as self-supported, highly efficient and durable oxygen evolution electrode
FeCoNi	0.1 M KOH	440 mV	8.3 h	0.723	CoFeNi/N-codoped carbon nanotubes with small diameters derived from spherical Prussian blue analog as bifunctional oxygen electrocatalysts for rechargeable Zn-air batteries
FeCoNi	1 M KOH	204.4 mV	18 h	0.95	Core–Shell Dendritic Superstructural Catalysts by Design for Highly Efficient and Stable Electrochemical Oxygen Evolution Reaction
FeCoNi	1 M KOH	286 mV	10 h	0.995	Unique NiFesingle bondNiCoO2 hollow polyhedron as bifunctional electrocatalysts for water splitting
FeCoNi	1 M KOH	359 mV	24 h	0.962	Atomic-level orbital coupling in a tri-metal alloy site enables highly efficient reversible oxygen electrocatalysis
NiFeSe	1 M KOH	156 mV	1000 h	0.9	Precisely engineering the electronic structure of active sites boosts the activity of iron-nickel selenide on nickel foam for highly efficient and stable overall water splitting
FeCuNi	0.1 M KOH	170.3 mV	24 h	0.71	Highly active and durable FexCuyNi1-x-y/FeOOH/NiOOH/CuO complex oxides for oxygen evolution reaction in alkaline media
CoFeMn	1 M KOH	193 mV	22 h	0.929	MnOx anchored on N and O co-doped carbon nanotubes encapsulated with FeCo alloy as highly efficient bifunctional electrocatalyst for rechargeable Zinc–Air batteries
FeCoNi	1 M KOH	215 mV	80 h	0.9	Flower-like Co3O4@NiFe-LDH nanosheets enable high-performance bifunctionality towards both electrocatalytic HER and OER in alkaline solution
FeCoNi	1 M KOH	321 mV	8.3 h	0.9	Boron, nitrogen co-doped biomass-derived carbon aerogel embedded nickel-cobalt-iron nanoparticles as a promising electrocatalyst for oxygen evolution reaction
RuNiCu	1 M KOH	246 mV	50 h	0.9689	Synergistic Ru-Ni-Cu interface for stable hydrogen evolution on 1% Ru-Ni@Cu alloy grown directly on carbon paper electrode
FeCuNi	1 M KOH	271 mV	130 h	0.99	Non-precious metal nanotube arrays hybrid catalyst prepared by a mutual template method for efficient water oxidation in alkaline medium
PtNiFe	1 M KOH	308 mV	27 h	0.95	PtNiFe nanoalloys with co-existence of energy-optimized active surfaces for synergistic catalysis of oxygen reduction and evolution
AgCuZn	1 M KOH	270 mV	27.7 h	0.888	In-Situ Generation of Oxide Nanowire Arrays from AgCuZn Alloy Sulfide with Enhanced Electrochemical Oxygen-Evolving Performance
PtLaIr	0.5 M H2SO4	205 mV	125 h	0.95	Tuning electronic correlations of ultra-small IrO2 nanoparticles with La and Pt for enhanced oxygen evolution performance and long-durable stability in acidic media
FeCoNi	1 M KOH	387 mV	9.7 h	1	FeCoNiB@Boron-doped vertically aligned graphene arrays: A self-supported electrocatalyst for overall water splitting in a wide pH range
RuFeCo	1 M KOH	303 mV	15 h	0.95	Layered double hydroxide drived ultra-evenly Rh-doped Co2Fe-P composite for high-efficient overall water splitting
RuCuCo	1 M KOH	279 mV	20 h	0.95	Engineering RuO2 on CuCo2O4/CuO nanoneedles as multifunctional electrodes for the hybrid supercapacitors and water oxidation catalysis
NiFeSn	1 M KOH	253 mV	12 h	0.95	Electrodeposition of self-supported Ni–Fe–Sn film on Ni foam: An efficient electrocatalyst for oxygen evolution reaction
FeNiTe	1 M KOH	280 mV	12 h	0.95	An Fe-doped NiTe bulk crystal as a robust catalyst for the electrochemical oxygen evolution reaction
CoFeMo	1 M KOH	242 mV	25 h	0.95	Construction of amorphous CoFeOx(OH)y/MoS2/CP electrode for superior OER performance
NiFeSn	1 M KOH	260 mV	11 h	0.95	Core–Shell Structured NiFeSn@NiFe (Oxy)Hydroxide Nanospheres from an Electrochemical Strategy for Electrocatalytic Oxygen Evolution Reaction
LaFeNi	0.1 M KOH	311 mV	10 h	0.722	The oxygen electrode bifunctionality studies: La2FeNiO6 double perovskite nanoparticles
FeCoNi	1 M KOH	228 mV	24 h	0.95	Magnetic-field guided synthesis of highly active Ni–S–CoFe2O4 electrocatalysts for oxygen evolution reaction
NiSeFe	1 M KOH	224 mV	20 h	0.95	Interface engineering of Ni3Se2@FeOOH heterostructure nanoforests for highly-efficient overall water splitting
NiMoFe	1 M KOH	286 mV	10 h	0.9	NiMoFe and NiMoFeP as Complementary Electrocatalysts for Efficient Overall Water Splitting and Their Application in PV-Electrolysis with STH 12.3%
CoNiRu	1 M KOH	240 mV	20 h	0.95	Oxide Passivated CoNi@NC-Supported Ru(OH)xCly Cluster as Highly Efficient Catalysts for the Oxygen and Hydrogen Evolution
PdCoFe	1 M KOH	259 mV	48 h	0.95	An efficient and durable bifunctional electrocatalyst based on PdO and Co2FeO4 for HER and OER
