# Supplementary material for: Finding the Pareto front for high-entropy-alloy catalysts
Source: Royal Society of Chemistry journal article supplement (doi:10.1039/d5sc06100h), 2026-01-01
Supplement: d5sc06100h2.zip [file mix-entropy.xlsx]

## Sheet: Sheet1
	1	3	4	5	6	7	11	12	13	14	15	19	20	21	22	23	24	25	26	27	28	29	30	31	32	33	37	38	39	40	41	42	43	44	45	46	47	48	49	50	51	55	56	57	58	59	60	61	62
1		-25	2	5	-3	-18	-16	-19	-8	-19	0.5	-16	-46	-60	-54	-39	-28	-34	-23	-23	-23	-6	-8	-8	-14.5	-1	-16	-45	-61	-69	46	-28	-21	-20	-23	-27	-10	-6	-6	-4	-1	-16	-49	-60	-61	-61	-61	-61	-61
3	-25		-5	6	-61	-145	4	0	-4	-30	-45.5	11	-1	12	34	37	35	19	26	8	1	-5	-7	-9	-34.5	-29	13	0	8	27	51	49	8	5	-14	-40	-16	-13	-12	-18	-28	16	0	6	7	7	7	8	8
4	2	-5		0	-15	-39	18	-3	0	-15	-3.5	27	-14	-36	-30	-16	-7	-10	-4	-4	4	0	4	5	-3.5	7	28	-10	-32	-43	-25	-7	-3	-3	-6	-8	6	11	16	15	18	29	-10	-29	-30	-31	-31	-33	-32
5	5	6	0		-10	-28	18	4	0	-14	0.5	27	-22	-55	-58	-42	-31	-32	-26	-24	-24	0	4	6	-0.5	10	28	-18	-50	-71	-54	-34	-25	-24	-25	-24	5	13	18	18	23	29	-19	-47	48	-49	49	-51	0.5
6	-3	-61	-15	-10		-2	-45	-55	-36	-39	-4.5	-43	-89	-118	-109	-82	-61	-66	-50	-42	-39	-33	-32	-33	-29.5	-14	-44	-87	-117	-131	-102	-67	-39	-35	-35	-32	-32	-27	-27	-23	-13	-43	-90	-116	-116	-117	-116	-118	-117
7	-18	-145	-39	-28	-2		-141	-134	-92	-81	-24.5	-152	-201	-224	-190	-143	-107	-119	-87	-75	-69	-84	-88	-95	-78.5	-59	-154	-206	-232	-233	-174	-115	-68	-61	-63	-62	-94	-91	-98	-90	-74	-155	-212	-235	-234	-233	-235	-233	-202
11	-16	4	18	18	-45	-141		10	13	-11	-26.5	1	1	34	68	73	71	49	62	41	32	16	6	5	-21.5	-14	2	-2	28	59	93	93	47	44	19	-15	0	-3	-5	-8	-20	3	-3	24	25	26	26	28	28
12	-19	0	-3	4	-55	-134	10		-2	-26	-39.5	20	-6	-3	16	23	24	10	18	3	4	-3	4	-4	-26.5	-21	23	-4	-6	6	32	36	3	0	-17	-40	-10	6	-4	-9	-16	25	4	-7	-7	6	-6	6	6
13	-8	-4	0	0	-36	-92	13	-2		-19	-20.5	23	-20	-38	-30	-16	-10	-19	-11	-19	-22	-1	1	1	-14.5	6	25	-18	-38	-44	-18	-5	-20	-21	-32	-46	-4	3	7	4	2	26	-20	-38	-38	-38	-38	-39	-38
14	-19	-30	-15	-14	-39	-81	-11	-26	-19		-25.5	4	51	-74	-66	-48	-37	45	-35	-38	-40	-19	-18	-17	-14.5	-17	4	-49	-73	-84	-56	-35	-38	-38	46	-55	-20	-13	-10	-11	-8	-3	-52	-73	-73	-73	-73	-74	-74
15	0.5	-45.5	-3.5	0.5	-4.5	-24.5	-26.5	-39.5	-20.5	-25.5		-24.5	-81.5	-112.5	100.5	-70.5	-49.5	-57.5	-39.5	-35.5	-34.5	-17.5	-17.5	-18.5	-17	-2.5	-24.5	-81.5	-113.5	127.5	-89.5	-53.5	-33.5	-30.5	-34.5	-36.5	-18.5	-11.5	-10.5	-7.5	2.5	-24.5	-85.5	-112.5	-112.5	-112.5	-112.5	-114.5	-113.5
19	-16	11	27	27	-43	-152	1	20	23	4	-24.5		12	58	94	96	91	66	81	55	45	25	13	12	-19.5	-11	0	7	50	88	123	120	65	60	31	-9	7	1	-4	-7	-22	0	6	46	47	49	49	51	50
20	-46	-1	-14	-22	-89	-201	1	-6	-20	51	-81.5	12		17	43	44	38	19	25	2	-7	-13	-22	-28	-59.5	-61	15	1	11	37	63	56	1	4	-28	-63	-28	-32	-35	-45	62	19	1	8	9	10	10	11	11
21	-60	12	-36	-55	-118	-224	34	-3	-38	-74	-112.5	58	17		8	7	1	-8	-11	-30	-39	-24	-29	-38	-69.5	-77	64	25	1	4	18	11	-39	-44	61	-86	-28	-30	-30	-45	-61	70	28	2	2	1	2	1	1
22	-54	34	-30	-58	-109	-190	68	16	-30	-66	100.5	94	43	8		-2	-7	-8	-17	-28	-35	-9	-15	-23	-51.5	-60	100	53	15	0	2	4	-39	43	-52	-65	-2	8	-5	-21	-33	104	57	20	18	17	17	15	15
23	-39	37	-16	-42	-82	-143	73	23	-16	-48	-70.5	96	44	7	-2		-2	-1	-7	-14	-18	5	-2	-8	-31.5	-35	100	54	17	-4	-1	0	-21	-25	-29	-35	17	9	12	-1	-8	103	57	22	20	18	18	16	17
24	-28	35	-7	-31	-61	-107	71	24	-10	-37	-49.5	91	38	1	-7	-2		2	-1	-4	-7	12	5	-1	-18.5	-19	94	47	11	-12	-7	0	-9	-12	-13	-15	27	17	20	10	7	97	50	17	15	13	13	10	11
25	-34	19	-10	-32	-66	-119	49	10	-19	45	-57.5	66	19	-8	-8	-1	2		0	-5	-8	4	-6	-13	-31.5	-31	69	27	-1	-15	4	5	-8	-11	-16	-23	13	2	3	-7	-11	71	29	3	1	0	0	-2	-1
26	-23	26	-4	-26	-50	-87	62	18	-11	-35	-39.5	81	25	-11	-17	-7	-1	0		-1	-2	13	4	-2	-15.5	-14	83	34	-1	-25	-16	-2	-3	-5	-5	-4	28	17	19	11	10	85	37	5	3	1	1	2	-1
27	-23	8	-4	-24	-42	-75	41	3	-19	-38	-35.5	55	2	-30	-28	-14	-4	-5	-1		0	6	-5	-11	-21.5	-18	57	10	-22	-41	-25	-5	0	-1	-2	0	19	6	7	0	2	58	11	-17	-18	-20	-20	-23	-22
28	-23	1	4	-24	-39	-69	32	4	-22	-40	-34.5	45	-7	-39	-35	-18	-7	-8	-2	0		4	-9	-15	-23.5	-19	47	-1	-31	-49	-30	-7	1	0	-1	0	15	2	2	-0.4	-1	48	0	-27	-28	-30	-30	-32	-31
29	-6	-5	0	0	-33	-84	16	-3	-1	-19	-17.5	25	-13	-24	-9	5	12	4	13	6	4		1	1	-11.5	-3	27	-9	-22	-23	3	19	8	7	-2	-14	2	6	10	7	7	28	-9	-21	-21	-22	22	-23	22
30	-8	-7	4	4	-32	-88	6	4	1	-18	-17.5	13	-22	-29	-15	-2	5	-6	4	-5	-9	1		0	-15.5	6	14	-21	-31	-29	-1	12	4	-5	-17	-33	-4	1	3	1	-1	15	-23	-31	-31	-31	-31	-32	-31
31	-8	-9	5	6	-33	-95	5	-4	1	-17	-18.5	12	-28	-38	-23	-8	1	-13	-2	-11	-15	1	0		-15.5	6	13	-27	-40	-40	-8	7	-10	-11	-25	-42	-5	1	3	1	-1	14	-30	-41	-41	-41	40	41	40
32	-14.5	-34.5	-3.5	-0.5	-29.5	-78.5	-21.5	-26.5	-14.5	-14.5	-17	-19.5	-59.5	-69.5	-51.5	-31.5	-18.5	-31.5	-15.5	-21.5	-23.5	-11.5	-15.5	-15.5		-12.5	-19.5	-59.5	-72.5	-72.5	-36.5	-13.5	-18.5	-18.5	-29.5	-43.5	-17.5	-14.5	-13.5	-12.5	-10.5	-19.5	-63.5	-73.5	-73.5	-72.5	-101.5	-73.5	-72.5
33	-1	-29	7	10	-14	-59	-14	-21	6	-17	-2.5	-11	-61	-77	-60	-35	-19	-31	-14	-18	-19	-3	6	6	-12.5		-12	61	-80	-85	44	-16	-15	-14	-24	-36	-8	-4	-3	-1	3	-12	-66	-81	-81	-81	-80	-81	-80
37	-16	13	28	28	-44	-154	2	23	25	4	-24.5	0	15	64	100	100	94	69	83	57	47	27	14	13	-19.5	-12		10	56	95	130	125	67	62	33	-9	7	1	-4	-7	-24	0	9	52	53	55	55	57	56
38	-45	0	-10	-18	-87	-206	-2	-4	-18	-49	-81.5	7	1	25	53	54	47	27	34	10	-1	-9	-21	-27	-59.5	61	10		17	48	76	69	10	5	-22	-61	-27	-33	-37	-46	-66	14	0	14	15	16	16	18	17
39	-61	8	-32	-50	-117	-232	28	-6	-38	-73	-113.5	50	11	1	15	17	11	-1	-1	-22	-31	-22	-31	-40	-72.5	-80	56	17		9	30	24	-29	-34	-54	-84	-29	-35	-36	-51	-68	62	20	0	0	0	0	0	0
40	-69	27	-43	-71	-131	-233	59	6	-44	-84	127.5	88	37	4	0	-4	-12	-15	-25	-41	-49	-23	-29	-40	-72.5	-85	95	48	9		4	6	-53	-59	-72	-91	-20	-26	-25	-43	-60	101	52	13	12	10	10	9	9
41	46	51	-25	-54	-102	-174	93	32	-18	-56	-89.5	123	63	18	2	-1	-7	4	-16	-25	-30	3	-1	-8	-36.5	44	130	76	30	4		-6	-36	-41	-46	-53	16	11	15	-1	-11	135	81	36	34	32	32	29	30
42	-28	49	-7	-34	-67	-115	93	36	-5	-35	-53.5	120	56	11	4	0	0	5	-2	-5	-7	19	12	7	-13.5	-16	125	69	24	6	-6		-11	-14	-15	-15	36	28	33	20	17	128	73	31	29	26	26	23	24
43	-21	8	-3	-25	-39	-68	47	3	-20	-38	-33.5	65	1	-39	-39	-21	-9	-8	-3	0	1	8	4	-10	-18.5	-15	67	10	-29	-53	-36	-11		0	0	4	24	10	11	5	8	69	11	-23	-25	-27	-27	-30	-29
44	-20	5	-3	-24	-35	-61	44	0	-21	-38	-30.5	60	4	-44	43	-25	-12	-11	-5	-1	0	7	-5	-11	-18.5	-14	62	5	-34	-59	-41	-14	0		1	6	23	9	10	4	9	64	6	-28	-30	-32	-32	-35	-34
45	-23	-14	-6	-25	-35	-63	19	-17	-32	46	-34.5	31	-28	61	-52	-29	-13	-16	-5	-2	-1	-2	-17	-25	-29.5	-24	33	-22	-54	-72	-46	-15	0	1		2	10	6	-8	-13	-8	34	-21	-50	-52	-53	-53	-56	-54
46	-27	-40	-8	-24	-32	-62	-15	-40	-46	-55	-36.5	-9	-63	-86	-65	-35	-15	-23	-4	0	0	-14	-33	-42	-43.5	-36	-9	-61	-84	-91	-53	-15	4	6	2		-7	-26	-31	-34	-28	-9	-62	-82	-83	-83	-83	-86	-84
47	-10	-16	6	5	-32	-94	0	-10	-4	-20	-18.5	7	-28	-28	-2	17	27	13	28	19	15	2	-4	-5	-17.5	-8	7	-27	-29	-20	16	36	24	23	10	-7		-2	-2	-3	-4	8	-28	-30	-30	-30	-29	-30	30
48	-6	-13	11	13	-27	-91	-3	6	3	-13	-11.5	1	-32	-30	8	9	17	2	17	6	2	6	1	1	-14.5	-4	1	-33	-35	-26	11	28	10	9	6	-26	-2		0	0	-2	1	-36	-36	-36	-35	-35	-35	-35
49	-6	-12	16	18	-27	-98	-5	-4	7	-10	-10.5	-4	-35	-30	-5	12	20	3	19	7	2	10	3	3	-13.5	-3	-4	-37	-36	-25	15	33	11	10	-8	-31	-2	0		0	-4	-4	-42	-39	-38	-37	-37	-37	-36
50	-4	-18	15	18	-23	-90	-8	-9	4	-11	-7.5	-7	-45	-45	-21	-1	10	-7	11	0	-4	7	1	1	-12.5	-1	-7	-46	-51	-43	-1	20	5	4	-13	-34	-3	0	0		-1	-7	-51	-53	-52	-52	-51	-52	-51
51	-1	-28	18	23	-13	-74	-20	-16	2	-8	2.5	-22	62	-61	-33	-8	7	-11	10	2	-1	7	-1	-1	-10.5	3	-24	-66	-68	-60	-11	17	8	9	-8	-28	-4	-2	-4	-1		-25	-72	-71	-70	-69	69	69	68
55	-16	16	29	29	-43	-155	3	25	26	-3	-24.5	0	19	70	104	103	97	71	85	58	48	28	15	14	-19.5	-12	0	14	62	101	135	128	69	64	34	-9	8	1	-4	-7	-25		12	57	59	60	60	63	62
56	-49	0	-10	-19	-90	-212	-3	4	-20	-52	-85.5	6	1	28	57	57	50	29	37	11	0	-9	-23	-30	-63.5	-66	9	0	20	52	81	73	11	6	-21	-62	-28	-36	-42	-51	-72	12		16	17	18	18	20	20
57	-60	6	-29	-47	-116	-235	24	-7	-38	-73	-112.5	46	8	2	20	22	17	3	5	-17	-27	-21	-31	-41	-73.5	-81	52	14	0	13	36	31	-23	-28	-50	-82	-30	-36	-39	-53	-71	57	16		0	0	0	0	0
58	-61	7	-30	48	-116	-234	25	-7	-38	-73	-112.5	47	9	2	18	20	15	1	3	-18	-28	-21	-31	-41	-73.5	-81	53	15	0	12	34	29	-25	-30	-52	-83	-30	-36	-38	-52	-70	59	17	0		0	0	0	0
59	-61	7	-31	-49	-117	-233	26	6	-38	-73	-112.5	49	10	1	17	18	13	0	1	-20	-30	-22	-31	-41	-72.5	-81	55	16	0	10	32	26	-27	-32	-53	-83	-30	-35	-37	-52	-69	60	18	0	0		0	0	0
60	-61	7	-31	49	-116	-235	26	-6	-38	-73	-112.5	49	10	2	17	18	13	0	1	-20	-30	22	-31	40	-101.5	-80	55	16	0	10	32	26	-27	-32	-53	-83	-29	-35	-37	-51	69	60	18	0	0	0		0	0
61	-61	8	-33	-51	-118	-233	28	6	-39	-74	-114.5	51	11	1	15	16	10	-2	2	-23	-32	-23	-32	41	-73.5	-81	57	18	0	9	29	23	-30	-35	-56	-86	-30	-35	-37	-52	69	63	20	0	0	0	0		0
62	-61	8	-32	-50	-117	-202	28	6	-38	-74	-113.5	50	11	1	15	17	11	-1	-1	-22	-31	22	-31	40	-72.5	-80	56	17	0	9	30	24	-29	-34	-54	-84	30	-35	-36	-51	68	62	20	0	0	0	0	0
63	-45	-1	-12	-19	-87	-231	0	-5	-19	-49	-79.5	10	0	21	48	49	43	23	30	7	-3	-10	-21	-27	-58.5	60	13	0	14	42	69	63	6	2	-24	-61	-27	-32	-35	-44	-63	16	0	11	12	13	13	14	14
64	-61	8	-32	-50	-117	-232	28	6	-39	-73	-113.5	50	11	1	15	17	11	-1	-1	-22	-31	-22	-31	-40	-72.5	-80	56	17	0	9	30	24	-29	-34	-54	-84	-29	-35	-36	-51	-68	62	20	0	0	0	0	0	0
65	-61	9	-33	-51	-118	-232	29	-6	-39	-74	-113.5	52	12	1	14	15	9	-3	-3	-23	-32	-23	-31	-40	-72.5	-80	58	18	0	8	28	22	30	-35	-56	-85	-29	-34	-35	-50	67	64	21	0	0	0	0	0	0
66	-61	9	-32	-51	-117	-231	29	6	-38	-74	-112.5	51	12	1	14	15	9	-3	-3	-23	-32	-22	-31	40	-71.5	-80	58	18	0	8	27	22	-30	-35	-55	-84	-29	-34	-35	-50	-67	63	21	0	0	0	0	0	0
67	-60	8	-32	-50	-116	-229	28	6	-38	-73	-111.5	51	11	1	14	16	10	-2	-2	-22	-31	-22	-30	-39	-71.5	-79	57	18	0	9	28	22	-29	-34	-54	-83	-29	-33	-35	-49	66	62	20	0	0	0	0	0	0
68	-61	9	-33	-52	-118	-230	30	5	-38	-74	-113.5	53	13	0	13	14	8	4	-5	-24	-34	-23	-31	-40	-71.5	-79	59	20	0	7	26	20	-32	-37	-57	-85	-29	-33	-34	49	-66	65	22	1	0	0	0	0	0
69	-61	9	-33	52	-117	-229	30	-5	-38	-74	-112.5	52	13	0	12	13	8	4	-5	-24	-34	-23	-30	-39	-71.5	-79	59	20	0	7	25	19	-32	-37	-56	-85	-29	-33	-34	-49	66	65	22	1	0	0	0	0	0
70	-45	-1	-14	-22	-88	-199	2	6	-20	-51	-80.5	12	0	16	41	43	37	19	25	2	-7	-12	-21	-27	-58.5	-59	16	1	10	36	61	55	1	-4	-28	-62	-28	-31	-34	43	-61	19	1	8	8	9	9	11	10
71	-61	10	-35	-54	-119	-231	31	-5	-39	-75	-114.5	55	14	0	11	11	5	6	-7	-27	-36	-24	-31	-40	-71.5	-80	61	21	0	6	23	17	-35	-40	-59	-87	-30	-33	-34	-49	-66	67	24	1	1	0	0	0	0
72	-63	30	-37	-66	-123	-218	63	10	-39	-77	-117.5	92	39	5	0	-2	-9	-12	-21	-35	-42	-17	-24	-34	-65.5	-75	98	50	11	0	4	4	47	-52	-63	-80	13	-19	-18	-35	50	104	54	15	14	13	13	11	11
73	-46	48	-24	-54	-101	-173	89	30	-19	-56	-89.5	119	60	16	1	-1	-7	-4	-15	-24	-29	2	-3	-10	-37.5	45	125	73	27	3	0	-5	-35	-39	-45	-52	15	9	13	-3	-13	130	77	33	31	29	29	27	27
74	-24	50	-3	-31	-60	-103	97	38	-2	-31	-46.5	124	57	9	6	-1	1	6	0	-1	-3	22	15	11	-7.5	-9	129	70	24	-9	-8	0	-7	-10	-9	-6	43	33	38	27	25	132	74	32	29	26	26	23	24
75	-18	29	0	-25	-42	-72	73	21	-9	-31	-32.5	95	28	-17	-25	-13	-4	-1	0	2	2	18	8	3	-7.5	-6	98	39	-4	-35	-26	-7	0	-1	1	6	38	25	29	20	23	101	42	3	0	-2	-2	-5	-4
76	-19	11	-2	-24	-35	-60	52	5	-18	-36	-29.5	70	4	-39	41	-23	-11	-9	4	0	1	10	-1	-7	-14.5	-11	72	13	-28	-55	-39	-14	0	0	2	8	28	14	16	9	14	74	15	-21	-24	-26	-26	-29	-28
77	-20	-9	-5	-26	-32	-54	28	-13	-30	43	-30.5	42	-23	62	57	-34	-18	-18	-9	-3	-2	0	-13	-21	-24.5	-19	44	-16	53	-76	-53	-21	-2	-1	1	6	16	0	0	-5	1	45	-14	-48	-50	-52	-51	-55	-53
78	-24	-33	-10	-28	-30	-52	-1	-35	-44	-53	-34.5	9	-55	-89	-74	-45	-24	-28	-13	-7	-5	-12	-29	-38	-37.5	-31	9	-50	-83	-100	-67	-28	-3	-1	-2	2	-1	-18	-21	-25	-17	10	-50	-80	-81	-82	-82	-85	-84
79	-8	-37	0	-2	-20	-58	-14	-32	-22	-30	-13.5	-9	-60	-74	47	-19	0	-11	8	7	7	-9	-16	-19	-21.5	-11	-10	-59	-74	-74	-32	3	14	15	7	0	-6	-11	-11	-10	-4	-9	-60	-73	-73	-73	-73	-75	-74
80	-3	-19	15	19	-20	-81	-11	-10	4	-10	-4.5	-10	43	-37	-10	10	21	4	22	12	8	8	1	1	-11.5	0	-11	-45	-43	-31	11	32	18	18	2	-18	-1	0	-1	0	-1	-11	49	45	-44	43	43	43	-43
81	-3	-15	23	27	-19	-91	-11	-3	11	-4	-1.5	-13	40	-28	2	22	31	11	31	18	13	15	6	6	-9.5	3	-14	44	-35	-19	26	46	25	24	5	-21	3	2	0	2	-1	-15	-49	-38	-37	-36	-36	-35	-35
82	-1	-21	25	30	-13	-82	-18	8	10	-2	4.5	-21	-52	40	8	15	28	7	29	17	13	15	5	5	-7.5	6	-23	-56	-48	-33	17	42	26	25	6	-18	3	2	-1	2	1	-25	-62	-51	-50	49	-49	-49	48
83	0	-23	26	31	-12	-80	-20	-10	10	-2	5.5	-24	-56	-46	-14	10	24	3	26	14	10	15	4	4	-7.5	7	-26	-61	-54	-40	12	38	23	23	3	-21	2	1	-1	1	1	-27	-68	-58	-57	-56	-55	-55	-54
90	-61	14	-37	-57	-123	-237	39	-3	-40	-77	-119.5	65	19	0	8	9	2	-8	-11	-30	-39	-24	-30	-39	-72.5	-82	72	27	1	4	20	13	-39	-45	-63	-91	-29	-32	-31	-48	-65	78	30	3	2	2	2	1	1
92	-53	30	-27	-54	-105	-189	65	14	-30	-66	-98.5	93	37	3	0	1	-3	-5	-11	-23	-29	-7	-15	-25	-52.5	60	99	48	11	-3	4	2	-31	-36	-46	-59	0	-8	-7	-23	-34	104	52	15	14	12	12	10	11
94	-54	21	-25	-50	-102	-188	49	6	-33	-66	-95.5	72	24	-1	2	4	2	4	-6	-19	-25	-9	-20	-29	-56.5	-62	77	33	4	-3	9	8	-26	-30	-42	-58	-6	-16	-16	-30	42	81	36	7	6	5	5	4	4
[truncated: 24 more columns]
